# Supplementary material
Source: publisher figshare collection journal article supplement (https://gsajournals.figshare.com/ndownloader/files/28151880)
Supplement: Supplementary file 1 [file 28151880]

 56 1095
LS070_Carollia_perspicillata_mybaits_NODE_1_length_1948_cov_117.455371|OR56 ATGGCCTCACCCAGCAACTACTCCACTGCTCCAGTTTCTGAATTCCTCCTCATCTGCTTCCCTAACTACCAGAGTTGGCAGCACTGGCTGTCCCTGCCCCTCAGCCTCCTATTC---CTCCTGGCCATGGGGGCCAATGCCACCCTTCTGATCACCATCTGGCTGGAGGCATCTCTGCATGAGCCCATGTACTACCTGCTCAGCCTCCTCTCCCTGCTGGACATTGTGCTCTGCCTCACTGTCATCCCCAAGGTCCTGGCCATC---------TTCTGGTTTGACCTCAGGTCCATCAGCTTCTCTGCATGCTTCCTGCAGATGTTCATCATGAACAGTTTTTTAACCATGGAGTCCTGCarollia_castaneaTTCATGGTCATGGCCTATGATCGCTATGTGGCCATCTGCCACCCACTACGATACTCATCCATCATCACTAGCCAATTTGTG------GCCAAGGCTAGTGTCTTCATTGTCarollia_castaneaCGAAATGCCCTTCTCACTGCACCCATTCCTATTCTGACTGCCCGGCTCCATTACTGTGGAAAAAATGTCATTGAGAATTGTATC---------------TGTGCCAACCTGTCTGTGTGTAGGCTCTCCTGT---------GACAATTTCACCCTGAACAGAATCTACCAGTTTGTAGCTGGTTGGACCTTACTGGGCTCAGATTTCATTCTCATCTTCCTTTCCTACACCTTTATCCTAAAAACTGTGCTTAGA---------------------------------------TTCAAGGCCGAAGGGGCTGCAGTCAAAGCCCTGAGCarollia_castaneaTGCAGCTCCCACTTCATCCTCATCCTGTTCTTCAGCACCATCCTGCTGGTTGTGGTGTTGACAAATGTGGCCAGGAAGAGGGTCCCCATGGACATCCTGATCCTGCTCAATGTCCTTCAT---CACCTCATACCCCCTGCCTTGAACCCTATTGTTTATGGGGTTCGGACCAAAGAGATAAAACAAGGAATTCAGAAATTGCTCCAGAGA---------------------------GCAATG------------------------------------------
LS070_Carollia_perspicillata_mybaits_NODE_2_length_1562_cov_168.286869|OR56 ATGACTTCACCCAGCAACTACTCCACTGCTCCAGTTTCTGAATTTCTACTCATCTGCTTCCCTAACTACCAGAGTTGGCAGCACTGGCTGTCCCTGCCCCTCAGCCTCCTATTC---CTCCTGGCCATGGGGGCCAATGCCACCCTTCTGATCACCATCTGGCTGGAGGCATCTCTGCATGAGCCCATGTACTACCTGCTCAGCCTCCTCTCCCTGCTGGACATTGTGCTCTGCCTCACTGTCATCCCCAAGGTCCTGGCCATC---------TTCTGGTTTGACCTCAGGTCCATCAGCTTCTCTGCATGCTTCCTGCAGATGTTCATCATGAACAGTTTTTTAACCATGGAGTCCTGCarollia_castaneaTTCATGGTCATGGCCTATGATCGCTATGTGGCCATCTGCCACCCACTACGATACTCATCCATCATCACTAGCCAATTTGTG------GCCAAGGCTAGTGTCTTCATTGTCarollia_castaneaCGAAATGCCCTTCTCACTGCACCCATTCCTATTCTGACTGCCCGGCTCCATTACTGTGGAAAAAATGTCATTGAGAATTGTATC---------------TGTGCCAACCTGTCTGTGTGTAGGCTCTCCTGT---------GACAATTTCACCCTGAACAGAATCTACCAGTTTGTAGCTGGTTGGACCTTACTGGGCTCAGATTTCATTCTCATCTTCCTTTCCTACACCTTTATCCTAAAAACTGTGCTTAGA---------------------------------------TTCAAGGCCGAAGGGGCTGCAGTCAAAGCCCTGAGCarollia_castaneaTGCAGCTCCCACTTCATCCTCATCCTGTTCTTCAGCACCATCCTGCTGGTTGTGGTGTTGACAAATGTGGCCAGGAAGAGGGTCCCCATGGACATCCTGATCCTGCTCAATGTCCTTCAT---CACCTCATACCCCCTGCCTTGAACCCTATTGTTTATGGGGTTCGGACCAAAGAGATAAAACAAGGAATTCAGAAATTGCTCCAGAGA---------------------------GCAATG------------------------------------------
LS073_Carollia_sowelli_mybaits_NODE_3_length_1814_cov_101.201497|OR56 ATGGCCTCACCCAGCAACTACTCCACTGCTCCAGTCTCTGAATTCCTCCTCATCTGCTTCCCTAACTACCAGAGTTGGCAGCACTGGCTGTCCCTGCCCCTCAGCCTCCTATTC---CTCCTGGCCATGGGGGCCAATGCCACCCTTCTGATCACCATCTGGCTGGAGGCATCTCTGCATGAGCCCATGTACTACCTGCTCAGCCTCCTCTCCCTGCTGGACATTGTGCTCTGCCTCACTGTCATCCCCAAGGTCCTGGCCATC---------TTCTGGTTTGACCTCAGGTCCATCAGCTTCTCTGCCTGCTTCCTGCAGATGTTCATCATGAACAGTTTCCTCCCCATGGAGTCTTGCarollia_castaneaTTCATGGTCATGGCCTATGACCGCTATGTGGCCATCTGCCACCCACTACGATACTCATCCATCATCACTAGCCAATTTGTG------GCCAAGGCTAGTGTCTTCATTGTCarollia_castaneaCGAAATGCCCTTCTCCCTGCACCCATTCCTATTCTGACTGCCCGGCTCCGTTACTGTGGAAAAAATGTCATTGAGAATTGTATC---------------TGTGCCAACCTGTCTGTGTGTAGGCTCTCCTGT---------GACAATTTCACCCTGAACAGAATCTACCAGTTTGTAGCTGGTTGGACCTTACTGGGCTCAGATTTCATTCTCATCTTCCTCTCCTACACCTTTATCCTAAAAACTGTGCTTAGA---------------------------------------TTCAGGGCCGAGGGGGCTGCAGTCAAAGCCCTGAGCarollia_castaneaTGCGGCTCCCACTTCATCCTCATCCTGTTCTTCAGCACCATCCTGCTGGTTGTGGTGTTGACAAATGTGGCCAGGAAGAGGGTCCCCATGGACATCCTGATCCTGCTCAATGTCCTTCAT---CACCTCATACCCCCTGCCTTGAACCCCATTGTTTATGGGGTTCGGACCAAAGAGATAAAACAAGGAATTCAGAAATTGCTCCAGAGA---------------------------GCAATG------------------------------------------
LS073_Carollia_sowelli_mybaits_NODE_4_length_1604_cov_119.114604|OR56 ATGACTTCACCCAGCAACTACTCCACTGCTCCAGTCTCTGAATTCCTCCTCATCTGCTTCCCTAACTACCAGAGTTGGCAGCACTGGCTGTCCCTGCCCCTCAGCCTCCTATTC---CTCCTGGCCATGGGGGCCAATGCCACCCTTCTGATCACCATCTGGCTGGAGGCTTCTCTGCATGAGCCCATGTACTACCTGCTCAGCCTCCTCTCCCTGCTGGACATTGTGCTCTGCCTCACTGTCATCCCCAAGGTCCTGGCCATC---------TTCTGGTTTGACCTCAGGTCCATCAGCTTCTCTGCCTGCTTCCTGCAGATGTTCATCATGAACAGTTTCCTCCCCATGGAGTCTTGCarollia_castaneaTTCATGGTCATGGCCTATGACCGCTATGTGGCCATCTGCCACCCACTACGATACTCATCCATCATCACTAGCCAATTTGTG------GCCAAGGCTAGTGTCTTCATTGTCarollia_castaneaCGAAATGCCCTTCTCCCTGCACCCATTCCTATTCTGACTGCCCGGCTCCGTTACTGTGGAAAAAATGTCATTGAGAATTGTATC---------------TGTGCCAACCTGTCTGTGTGTAGGCTCTCCTGT---------GACAATTTCACCCTGAACAGAATCTACCAGTTTGTAGCTGGTTGGACCTTACTGGGCTCAGATTTCATTCTCATCTTCCTCTCCTACACCTTTATCCTAAAAACTGTGCTTAGA---------------------------------------TTCAGGGCCGAGGGGGCTGCAGTCAAAGCCCTGAGCarollia_castaneaTGCGGCTCCCACTTCATCCTCATCCTGTTCTTCAGCACCATCCTGCTGGTTGTGGTGTTGACAAATGTGGCCAGGAAGAGGGTCCCCATGGACATCCTGATCCTGCTCAATGTCCTTCAT---CACCTCATACCCCCTGCCTTGAACCCCATTGTTTATGGGGTTCGGACCAAAGAGATAAAACAAGGAATTCAGAAATTGCTCCAGAGA---------------------------GCAATG------------------------------------------
LS073_Carollia_sowelli_mybaits_NODE_8_length_1183_cov_129.944846|OR56 ------------------------------------------------------------------------------------------------------------------------------------------------------------------------------------------------------------------------------ATTGTGCTCTGCCTCACTGTCATCCCCAAGGTCCTGGCCATC---------TTCTGGTTTGACCTCAGGTCCATCAGCTTCTCTGCCTGCTTCCTGCAGATGTTCATCATGAACAGTTTCCTCCCCATGGAGTCTTGCarollia_castaneaTTCATGGTCATGGCCTATGACCGCTATGTGGCCATCTGCCACCCACTACGATACTCATCCATCATCACTAGCCAATTTGTG------GCCAAGGCTAGTGTCTTCATTGTCarollia_castaneaCGAAATGCCCTTCTCCCTGCACCCATTCCTATTCTGACTGCCCGGCTCCGTTACTGTGGAAAAAATGTCATTGAGAATTGTATC---------------TGTGCCAACCTGTCTGTGTGTAGGCTCTCCTGT---------GACAATTTCACCCTGAACAGAATCTACCAGTTTGTAGCTGGTTGGACCTTACTGGGCTCAGATTTCATTCTCATCTTCCTCTCCTACACCTTTATCCTAAAAACTGTGCTTAGA---------------------------------------TTCAGGGCCGAGGGGGCTGCAGTCAAAGCCCTGAGCarollia_castaneaTGCGGCTCCCACTTCATCCTCATCCTGTTCTTCAGCACCATCCTGCTGGTTGTGGTGTTGACAAATGTGGCCAGGAAGAGGGTCCCCATGGACATCCTGATCCTGCTCAATGTCCTTCAT---CACCTCATACCCCCTGCCTTGAACCCCATTGTTTATGGGGTTCGGACCAAAGAGATAAAACAAGGAATTCAGAAATTGCTCCAGAGA---------------------------GCAATG------------------------------------------
LS073_Carollia_sowelli_mybaits_NODE_31_length_1355_cov_87.003130|OR56 ---ACTTCACCCAGCAACTACTCCACTGCTCCAGTCTCTGAATTCCTCCTCATCTGCTTCCCTAACTACCAGAGTTGGCAGCACTGGCTGTCCCTGCCCCTCAGCCTCCTATTC---CTCCTGGCCATGGGGGCCAATGCCACCCTTCTGATCACCATCTGGCTGGAGGCTTCTCTGCATGAGCCCATGTACTACCTGCTCAGCCTCCTCTCCCTGCTGGACATTGTGCTCTGCCTCACTGTCATCCCCAAGGTCCTGGCCATC---------TTCTGGTTTGACCTCAGGTCCATCAGCTTCTCTGCCTGCTTCCTGCAGATGTTCATCATGAACAGTTTCCTCCCCATGGAGTCTTGCarollia_castaneaTTCATGGTCATGGCCTATGACCGCTATGTGGCCATCTGCCACCCACTACGATACTCATCCATCATCACTAGCCAATTTGTG------GCCAAGGCTAGTGTCTTCATTGTCarollia_castaneaCGAAATACCCTTCTCCCTGCGCCCATTCCTATTCTGACTGCCCGGCTCCGTTACTGTGGAAAAAATGTCATTGAGAATTGTATC---------------TGTGCCAACCTGTCTGTGTGTAGGCTCTCCTGT---------GACAATTTCACCCTGAACAGAATCTACCAGTTTGTAGCTGGTTGGACCTTACTGGGCTCAGATTTCATTCTCATCTTCCTCTCCTACACCTTTATCCTAAAAACTGTGCTTAGA---------------------------------------TTCAGGGCCGAGGGGGCTGCAGTCAAAGCCCTGAGCarollia_castaneaTGCGGCTCCCACTTCATCCTCATCCTGTTCTTCAGCACCATCCTGCTGGTTGTGGTGTTGACAAATGTGGCCAGGAAGAGGGTCCCCATGGACATCCTGATCCTGCTCAATGTCCTTCAT---CACCTCATACCCCCTGCCTTGAACCCCATTGTTTATGGGGTTCGGACCAAAGAGATA---------------------------------------------------------------------------------------------------------
LS084_Carollia_castanea_mybaits_NODE_4_length_1749_cov_40.536483|OR56 ATGGCATCACCCAGCAACTACTCCACTGCTCCAGTCTCTGAATTTCTACTCATCTGCTTCCCTAGCTACCAGAGTTGGCAGCACTGGCTGTCCCTGCCCCTCAGCCTCCTATTC---CTCCTGGCCATGGGGGCCAATGCCACCCTTCTGATCACCATCCGGCTGGAGGCATCTCTGCATGAGCCCATGTACTACCTGCTCAGCCTCCTCTCCCTGCTGGACATTGTGCTCTGCCTCACTGTCATCCCCAAGGTCCTGGCCATC---------TTCTGGTTTGACCTCAGGTCCATCAGCTTCTCTGCCTGCTTCCTGCAGATGTTTATCATGAACAGTTTCCTCCCCATGGAGTCTTGCarollia_castaneaTTCATGGTCATGGCCTATGACCGCTACGTGGCCATCTGCCACCCACTACGATATTCATCCATCATCACTAGCCAATTTGTG------GCCAAGGCTAGTGTCTTCATTGTCarollia_castaneaCGAAATACCCTTCTCACTGCACCCATTCCTATTCTGACTGCCCGGCTCCGTTACTGTGGAAAAAATGTCATTGAGAATTGTATC---------------TGTGCCAACCTGTCTGTGTCTAGGCTCTCCTGT---------GACAATTTCACCCTGAACAGAATCTACCAGTTTGTAGCTGCTTGGACCTTACTGGGCTCAGATTTCATTCTCATCTTCCTCTCCTACACCTTTATCCTAAAAACTGTGCTTAGA---------------------------------------TTCAGGGCCGAGGGGGCTGCAGTCAAAGCCCTGAACarollia_castaneaTGCAGCTCCCACTTCATCCTCATCCTGTTCTTCAGCACCATCCTGCTGGTTGTAGTGTTGACAAATGTGGCCAGGAAGAGGGTCCCCATGGACATCCTGATCCTGCTCAATGTCCTTCAT---CACCTCATACCCCCTGCCTTGAACCCTATTGTTTATGGGGTTCGGACCAAAGAGATAAAACAAGGAATTCAGAAATTGCTCCAGAGA---------------------------GCAATG------------------------------------------
LS084_Carollia_castanea_mybaits_NODE_30_length_1363_cov_24.533437|OR56 ---ACTTCACCCAGCAACGGCTCCACTGCTCCAGTCTCTGAATTCTTCCTCATCTGCTTCCCTAACTACCAGAGTTGGCAGCACTGGCTGTCCCTGCCCCTCAGCCTCCTATTC---CTCCTGGCCATGGGGGCCAATGCCACCCTTCTGATCACCATCCGGCTGGAGGCATCTCTGCATGAGCCCATGTACTACCTGCTCAGCCTCCTCTCCCTGCTGGACATTGTGCTCTGCCTCACTGTCATCCCCAAGGTCCTGGCCATC---------TTCTGGTTTGACCTCAGGTCCATCAGCTTCTCTGCCTGCTTCCTGCAGATGTTTATCATGAACAGTTTCCTCCCCATGGAGTCTTGCarollia_castaneaTTCATGGTCATGGCCTATGACCGCTACGTGGCCATCTGCCACCCACTACGATATTCATCCATCATCACTAGCCAATTTGTG------GCCAAGGCTAGTGTCTTCATTGTCarollia_castaneaCGAAATACCCTTCTCACTGCACCCATTCCTATTCTGACTGCCCGGCTCCGTTACTGTGGAAAAAATGTCATTGAGAATTGTATC---------------TGTGCCAACCTGTCTGTGTCTAGGCTCTCCTGT---------GACAATTTCACCCTGAACAGAATCTACCAGTTTGTAGCTGCTTGGACCTTACTGGGCTCAGATTTCATTCTCATCTTCCTCTCCTACACCTTTATCCTAAAAACTGTGCTTAGA---------------------------------------TTCAGGGCCGAGGGGGCTGCAGTCAAAGCCCTGAACarollia_castaneaTGCAGCTCCCACTTCATCCTCATCCTGTTCTTCAGCACCATCCTGCTGGTTGTAGTGTTGACAAATGTGGCCAGGAAGAGGGTCCCCATGGACATCCTGATCCTGCTCAATGTCCTTCAT---CACCTCATACCCCCTGCCTTGAACCCTATTGTTTATGGGGTTCGGACCAAAGAGATAAAACAAGGAATT---------------------------------------------------------------------------------------------
LS084_Carollia_castanea_mybaits_NODE_30_length_1382_cov_23.378544|OR56 ATGACTTCACCCAGCAACGGCTCCACTGCTCCAGTCTCTGAATTCTTCCTCATCTGCTTCCCTAACTACCAGAGTTGGCAGCACTGGCTGTCCCTGCCCCTCAGCCTCCTATTC---CTCCTGGCCATGGGGGCCAATGCCACCCTTCTGATCACCATCTGGCTGGAGGCATCTCTGCATGAGCCCATGTACTACCTGCTCAGCCTCCTCTCCCTGCTGGACATTGTGCTCTGCCTCACTGTCATCCCCAAGGTCCTGGCCATC---------TTCTGGTTTGACCTCAGGTCCATCAGCTTCTCTGCCTGCTTCCTGCAGATGTTTATCATGAACAGTTTCCTCCCCATGGAGTCTTGCarollia_castaneaTTCATGGTCATGGCCTATGACCGCTACGTGGCCATCTGCCACCCACTACGATATTCATCCATCATCACTAGCCAATTTGTG------GCCAAGGCTAGTGTCTTCATTGTCarollia_castaneaCGAAATACCCTTCTCACTGCACCCATTCCTATTCTGACTGCCCGGCTCCGTTACTGTGGAAAAAATGTCATTGAGAATTGTATC---------------TGTGCCAACCTGTCTGTGTCTAGGCTCTCCTGT---------GACAATTTCACCCTGAACAGAATCTACCAGTTTGTAGCTGCTTGGACCTTACTGGGCTCAGATTTCATTCTCATCTTCCTCTCCTACACCTTTATCCTAAAAACTGTGCTTAGA---------------------------------------TTCAGGGCCGAGGGGGCTGCAGTCAAAGCCCTGAACarollia_castaneaTGCAGCTCCCACTTCATCCTCATCCTGTTCTTCAGCACCATCCTGCTGGTTGTAGTGTTGACAAATGTGGCCAGGAAGAGGGTCCCCATGGACATCCTGATCCTGCTCAATGTCCTTCAT---CACCTCATACCCCCTGCCTTGAACCCTATTGTTTATGGGGTTCGGACCAAAGAGATAAAACAAGGAATTCAGAAATTGCTCCAGAGA---------------------------GCAATG------------------------------------------
LS084_Carollia_castanea_mybaits_NODE_30_length_1616_cov_22.695906|OR56 ATGACTTCACCCAGCAACGGCTCCACTGCTCCAGTCTCTGAATTCTTCCTCATCTGCTTCCCTAACTACCAGAGTTGGCAGCACTGGCTGTCCCTGCCCCTCAGCCTCCTATTC---CTCCTGGCCATGGGGGCCAATGCCACCCTTCTGATCACCATCCGGCTGGAGGCATCTCTGCATGAGCCCATGTACTACCTGCTCAGCCTCCTCTCCCTGCTGGACATTGTGCTCTGCCTCACTGTCATCCCCAAGGTCCTGGCCATC---------TTCTGGTTTGACCTCAGGTCCATCAGCTTCTCTGCCTGCTTCCTGCAGATGTTTATCATGAACAGTTTCCTCCCCATGGAGTCTTGCarollia_castaneaTTCATGGTCATGGCCTATGACCGCTACGTGGCCATCTGCCACCCACTACGATATTCATCCATCATCACTAGCCAATTTGTG------GCCAAGGCTAGTGTCTTCATTGTCarollia_castaneaCGAAATACCCTTCTCACTGCACCCATTCCTATTCTGACTGCCCGGCTCCGTTACTGTGGAAAAAATGTCATTGAGAATTGTATC---------------TGTGCCAACCTGTCTGTGTCTAGGCTCTCCTGT---------GACAATTTCACCCTGAACAGAATCTACCAGTTTGTAGCTGCTTGGACCTTACTGGGCTCAGATTTCATTCTCATCTTCCTCTCCTACACCTTTATCCTAAAAACTGTGCTTAGA---------------------------------------TTCAGGGCCGAGGGGGCTGCAGTCAAAGCCCTGAACarollia_castaneaTGCAGCTCCCACTTCATCCTCATCCTGTTCTTCAGCACCATCCTGCTGGTTGTAGTGTTGACAAATGTGGCCAGGAAGAGGGTCCCCATGGACATCCTGATCCTGCTCAATGTCCTTCAT---CACCTCATACCCCCTGCCTTGAACCCTATTGTTTATGGGGTTCGGACCAAAGAGATAAAACAAGGAATTCAGAAATTGCTCCAGAGA---------------------------GCAATG------------------------------------------
LS073_Carollia_sowelli_mybaits_NODE_40_length_648_cov_44.961471|OR56 ------------------------------------------------------------------------------------------------------------------------------------------------------------------------------------------------------------------------------------------------------------------GCCATC---------TTCTGGTTTGACCTCAGGTCCATCAGCTTCTCTGCCTGCTTCCTGCAGATGTTCATCATGAACAGTTTCCTCCCCATGGAGTCTTGCarollia_castaneaTTCATGGTCATGGCCTATGACCGCTATGTGGCCATCTGCCACCCACTACGATACTCATCCATCATCACTAGCCAATTTGTG------GCCAAGGCTAGTGTCTTCATTGTCarollia_castaneaCGAAATACCCTTCTCCCTGCGCCCATTCCTATTCTGACTGCCCGGCTCCGTTACTGTGGAAAAAATGTCATTGAGAATTGTATC---------------TGTGCCAACCTGTCTGTGTGTAGGCTCTCCTGT---------GACAATTTCACCCTGAACAGAATCTACCAGTTTGTAGCTGGTTGGACCTTACTGGGCTCAGATTTCATTCTCATCTTCCTCTCCTACACCTTTATCCTAAAAACTGTGCTTAGA---------------------------------------TTCAGGGCCGAGGGGGCTGCAGTCAAAGCCCTGAGCarollia_castaneaTGCGGCCCCCACTGCATCCTCATCCTGTCCTTCAGCACCATCCTGCTGGTTGTGGTGTTGACAAATGTGGCCAGGAAGAGGGTCCCCATGGACATCCTGATCCTGCTCAATGTCCTTCAT---CACCTCATACCCCCTGCCTTGAACCCCATTGTTTATGGGGTTCGGACCAAA---------------------------------------------------------------------------------------------------------------
LS073_Carollia_sowelli_mybaits_NODE_40_length_654_cov_42.188908|OR56 ------------------------------------------------------------------------------------------------------------------------------------------------------------------------------------------------------------------------------------------------------------------GCCATC---------TTCTGGTTTGACCTCAGGTCCATCAGCTTCTCTGCCTGCTTCCTGCAGATGTTCATCATGAACAGTTTCCTCCCCATGGAGTCTTGCarollia_castaneaTTCATGGTCATGGCCTATGACCGCTATGTGGCCATCTGCCACCCACTACGATACTCATCCATCATCACTAGCCAATTTGTG------GCCAAGGCTAGTGTCTTCATTGTCarollia_castaneaCGAAATACCCTTCTCCCTGCGCCCATTCCTATTCTGACTGCCCGGCTCCGTTACTGTGGAAAAAATGTCATTGAGAATTGTATC---------------TGTGCCAACCTGTCTGTGTGTAGGCTCTCCTGT---------GACAATTTCACCCTGAACAGAATCTACCAGTTTGTAGCTGGTTGGACCTTACTGGGCTCAGATTTCATTCTCATCTTCCTCTCCTACACCTTTATCCTAAAAACTGTGCTTAGA---------------------------------------TTCAGGGCCGAAGGGGCTGCAGTCAAAGCCCTGAGCarollia_castaneaTGCAGCCCCCACTTCATCCTCATCCTGTCCTTCAGCACCTTCCTGCTGGTTGTGATGTTGACAAATGTGGCCAGGAAGAGGGTCCCCATGGACATCCTGATCCTGCTCAATGTCCTTCAT---CACCTCATACCCCCTGCCTTGAACCCCATTGTTTATGGGGTTCGGACCAAAGAGATA---------------------------------------------------------------------------------------------------------
LS070_Carollia_perspicillata_mybaits_NODE_38_length_655_cov_107.787197|OR56 ---------------------------------------------------------------------------------------------------------------------------------------------------------------------------------------------------------------------------------GTGCTCTGCCTCACTGTCATCCCCAAGGTCCTGGCCATC---------TTCTGGTTTGACCTCAGGTCCATCAGCTTCTCTGCATGCTTCCTGCAGATGTTCATCATGAACAGTTTCCTCCCCATGGAGTCCTGCCCATTCATGGTCATGGACTATGATCGCTATGTGGCCATCTGCCACCCACTACGATACTCATCCATCATCACTAGCCAATTTGTG------GCCAAGGCTAGTGTCTTCATTGTCarollia_castaneaCGAAATGCCCTTCTCACTGCACCCATTCCTATTCTGACTGCCCGGCTCCGTTACTGTGGAAAAAATGTCATTGAGAATTGTATC---------------TGTGCCAACCTGTCTGTGTGTAGGCTCTCCTGT---------GACAATTTCACCCTGAACAGAATCTACCAGTTTGTAGCTGGTTGGACCTTACTGGGCTCAGATTTCATTCTCATCTTCCTTTCCTACACCTTTATCCTAAAAACTGTGCTTAGA---------------------------------------TTCAAGGCCGAAGGGGCTGCAGTCAAAGCCCTGAGCarollia_castaneaTGCGGCTCCCACTTCATCCTCATCCTGTTCTTCAGCACCATCCTGCTGGTTGTGGTGTTGACAAATGTGGCCAGGAAGAGGGTCCCCATGGACATCCTGATCCTGCTCAATGTCCTTCAT---CACCTCATACCCCCTGCCTTGAAC------------------------------------------------------------------------------------------------------------------------------------------
LS070_Carollia_perspicillata_mybaits_NODE_40_length_611_cov_79.011236|OR56 ------------------------------------------------------------------------------------------------------------------------------------------------------------------------------------------------------------------------------------------------------------------GCCATC---------TTCTGGTTTGACCTCAGGTCCATCAGCTTCTCTGCCTGCTTCCTGCAGATGTTCATCATGAACAGTTTCCTCCCCATGGAGTCCTGCCCATTCATGGTCATGGACTATGATCGCTATGTGGCCATCTGCCACCCACTACGATACTCATCCATCATCACTAGCCAATTTGTG------GCCAAGGCTAGTGTCTTCATTGTCarollia_castaneaCGAAATGCCCTTCTCACTGCACCCATTCCTATTCTGACTGCCCGGCTCCGTTACTGTGGAAAAAATGTCATTGAGAATTGTATC---------------TGTGCCAACCTGTCTGTGTGTAGGCTCTCCTGT---------GACAATTTCACCCTGAACAGAATCTACCAGTTTGTAGCTGGTTGGACTTTACTGGGCTCAGATTTCATTCTCATCTTCCTCTCCTACACCTTTATCCTAAAAACTGTGCTTAGA---------------------------------------TTCAGGGCCGAGGGGGCTGCAGTCAAAGCCCTGAGCarollia_castaneaTGCAGCCCCCACTTCATCCTCATCCTGTCCTTCAGCACCTTCCTGCTGGTTGTGGTGTTGACAAATGTGGCCAGGAAGAGGGTCCCCATGGACATCCTGATCCTGCTCAATGTCCTTCACCTCCAT---------------------------------------------------------------------------------------------------------------------------------------------------------------
LS070_Carollia_perspicillata_mybaits_NODE_40_length_656_cov_86.132988|OR56 ---------------------------------------------------------------------------------------------------------------------------------------------------------------------------------------------------------------------------------GTGCTCTGCCTCACTGTCATCCCCAAGGTCCTGGCCATC---------TTCTGGTTTGACCTCAGGTCCATCAGCTTCTCTGCCTGCTTCCTGCAGATGTTCATCATGAACAGTTTCCTCCCCATGGAGTCCTGCCCATTCATGGTCATGGACTATGATCGCTATGTGGCCATCTGCCACCCACTACGATACTCATCCATCATCACTAGCCAATTTGTG------GCCAAGGCTAGTGTCTTCATTGTCarollia_castaneaCGAAATGCCCTTCTCACTGCACCCATTCCTATTCTGACTGCCCGGCTCCGTTACTGTGGAAAAAATGTCATTGAGAATTGTATC---------------TGTGCCAACCTGTCTGTGTGTAGGCTCTCCTGT---------GACAATTTCACCCTGAACAGAATCTACCAGTTTGTAGCTGGTTGGACCTTACTGGGCTCAGATTTCATTCTCATCTTCCTTTCCTACACCTTTATCCTAAAAACTGTGCTTAGA---------------------------------------TTCAAGGCCGAAGGGGCTGCAGTCAAAGCCCTGAGCarollia_castaneaTGCAGCTCCCACTTCATCCTCATCCTGTTCTTCAGCACCATCCTGCTGGTTGTGGTGTTGACAAATGTGGCCAGGAAGAGGGTCCCCATGGACATCCTGATCCTGCTCAATGTCCTTCACCTCCATCTTGAACCC---------------------TATTATGTA------------------------------------------------------------------------------------------------------------------------
LS073_Carollia_sowelli_mybaits_NODE_9_length_980_cov_87.250277|OR56 ---------------------------------------------------------------------------------------------------------------------------------------------------------------------------------------------------------------------------------------------------------------CTGGCCATC---------TTCTGGTTTGACCTCAGGTCCATCAGCTTCTCTGCCTGCTTCCTGCAGATGTTCATCATGAACAGTTTCCTCCCCATGGAGTCTTGCarollia_castaneaTTCATGGTCATGGCCTATGACCGCTATGTGGCCATCTGCCACCCACTACGATACTCATCCATCATCACTAGCCAATTTGTG------GCCAAGGCTAGTGTCTTCATTGTCarollia_castaneaCGAAATACCCTTCTCCCTGCGCCCATTCCTATTCTGACTGCCCGGCTCCGTTACTGTGGAAAAAATGTCATTGAGAATTGTATC---------------TGTGCCAACCTGTCTGTGTGTAGGCTCTCCTGT---------GACAATTTCACCCTGAACAGAATCTACCAGTTTGTAGCTGGTTGGACCTTACTGGGCTCAGATTTCATTCTCATCTTCCTCTCCTACACCTTTATCCTAAAAACTGTGCTTAGA---------------------------------------TTCAGGGCCGAAGGGGCTGCAGTCAAAGCCCTGAGCarollia_castaneaTGCAGCCCCCACTTCATCCTCATCCTGTCCTTCAGCACCTTCCTGCTGGTTGTGATGTTGACAAATGTGGCCAGGAAGAGGGTCCCCATGGACATCCTGATCCTGCTCAATGTCCTTCACCTCCATCTTGAACCC---------------------TATTATGTATGTTTT------------------------------------------------------------------------------------------------------------------
LS073_Carollia_sowelli_mybaits_NODE_40_length_661_cov_50.541096|OR56 ---------------------------------------------------------------------------------------------------------------------------------------------------------------------------------------------------------------------------------------------------------------CTGGCCATC---------TTCTGGTTTGACCTCAGGTCCATCAGCTTCTCTGCCTGCTTCCTGCAGATGTTCATCATGAACAGTTTCCTCCCCATGGAGTCTTGCarollia_castaneaTTCATGGTCATGGCCTATGACCGCTATGTGGCCATCTGCCACCCACTACGATACTCATCCATCATCACTAGCCAATTTGTG------GCCAAGGCTAGTGTCTTCATTGTCarollia_castaneaCGAAATACCCTTCTCCCTGCGCCCATTCCTATTCTGACTGCCCGGCTCCGTTACTGTGGAAAAAATGTCATTGAGAATTGTATC---------------TGTGCCAACCTGTCTGTGTGTAGGCTCTCCTGT---------GACAATTTCACCCTGAACAGAATCTACCAGTTTGTAGCTGGTTGGACCTTACTGGGCTCAGATTTCATTCTCATCTTCCTCTCCTACACCTTTATCCTAAAAACTGTGCTTAGA---------------------------------------TTCAGGGCCGAGGGGGCTGCAGTCAAAGCCCTGAGCarollia_castaneaTGCGGCTCCCACTTCATCCTCATCCTGTTCTTCAGCACCATCCTGCTGGTTGTGGTGTTGACAAATGTGGCCAGGAAGAGGGTCCCCATGGACATCCTGATCCTTCTCAATGTCCTTCACCTCAATCTTGAACCC---------------------TATTATGTATGTTTT------------------------------------------------------------------------------------------------------------------
LS070_Carollia_perspicillata_mybaits_NODE_10_length_617_cov_461.614815|OR56 ------------------------------------------------------------------------------------------------------------------------------------------------------------------------------------------------------------------------------------------------------------------------------------------------------------------------------CAGATGTTCATCATGAACAGTTTTTTAACCATGGAGTCCTGCarollia_castaneaTTCATGGTCATGGCCTATGACCGCTATGTGGCCATCTGCCACCCACTAAGATACCCATCCATCATCACTGATCAATTTGTG------GCTAGAGCTACCATGTTTGTTGTAGCTCGGAATGCCCTGCTTTCTCTTCCTGTTCCAGTCCTGTCTTCTCGACTCAGATACTGTGCAGAGAACATCATCAAGAACTGCATC---------------TGCACTAACCTGTCTGTGTCCAGACTCTCCTGT---------GATGACATCACCTTCAACCGGCTCTACCAGTTTGTGACAGGCTGGACCCTGCTGGGCTCTGATCTCATCCTTATTGTTCTCTCCTACTCCTTCATCCTGAAAGCTGTGCTAAAG---------------------------------------ATCAAGGCTGAGGGTGCTGCAGCCAAGGCCCTGAGCACCTGTGGTTCTCACTTCATCCTCATCCTCTTCTTCAGCarollia_castaneaGTCCTGCTGGTTCTGGTCATCACCAACCTGGCCAGGAAGAGAATCCCCCCAGATGTCCCCATCCTGCTCAACATCCTGCAC---CACCTGATCCCCCCAGCTCTGAACCCCATTGTTTATGGTGTGAGAACCAAGGAGATCAAG------------------------------------------------------------------------------------------------------
LS073_Carollia_sowelli_mybaits_NODE_3_length_1716_cov_149.159243|OR56 ATGACTTCACCCAGCAACTACTCCACTGCTCCAGTCTCTGAATTCCTCCTCATCTGCTTCCCTAACTACCAGAGTTGGCAGCACTGGCTGTCCCTGCCCCTCAGCCTCCTATTC---CTCCTGGCCATGGGGGCCAATGCCACCCTTCTGATCACCATCTGGCTGGAGGCTTCTCTGCATGAGCCCATGTACTACCTGCTCAGCCTCCTCTCCCTGCTGGACATTGTGCTCTGCCTCACTGTCATCCCCAAGGTCCTGGCCATC---------TTCTGGTTTGACCTCAGGTCCATCAGCTTCTCTGCCTGCTTCCTGCAGATGTTCATCATGAACAGTTTTTTAACCATGGAGTCCTGCarollia_castaneaTTCATGGTCATGGCCTATGACCGCTATGTGGCCATCTGCCACCCACTAAGATACCCATCCATCATCACTGATCAATTTGTG------GCTAGAGCTACCATGTTTGTTGTAGCCCGGAATGCCCTACTTTTTCTTCCTGTTCCAGTCCTGTCTTCTCGACTCAGATACTGTGCAGAGAACATCATCAAGAACTGCATC---------------TGCACTAACCTGTCTGTGTCCAGACTCTCCTGT---------GATGACATCACCTTCAACCGGCTCTACCAGTTTGTGACAGGCTGGACCCTGCTGGGCTCTGATCTCATCCTTATTGTTCTCTCCTACTCCTTCATCCTGAAAGCTGTGCTAAGG---------------------------------------ATCAAGGCTGAGGGTGCTGCAGCCAAGGCTCTGAGCACCTGTGGTTCTCACTTCATCCTCATCCTCTTCTTCAGCarollia_castaneaGTCCTGCTGGTTCTGGTCATCACCAACCTGGCCAGGAAGAGAATCCCCCCAGATGTCCCCATCCTGCTCAACATCCTGCAC---CACCTGATCCCCCCAGCTCTGAACCCCATTGTTTATGGTGTGAGAACCAAGGAGATCAAGCAGGGAATCCTGAAACTACTG---AGG---------------------------AGTCTG------------------------------------------
LS073_Carollia_sowelli_mybaits_NODE_27_length_1487_cov_80.403546|OR56 ATGACTTCACCCAGCAACTACTCCACTGCTCCAGTTTCTGAATTTCTCCTCATCTGCTTCCCTAACTACCAGAGTTGGCAGCACTGGCTGTCCCTGCCCCTCAGCCTCCTATTC---CTCCTGGCCATGGGGGCCAATGCCACCCTTCTGATCACCATCTGGCTGGAGGCTTCTCTGCATGAGCCCATGTACTACCTGCTCAGCCTCCTCTCCCTGCTGGACATTGTGCTCTGCCTCACTGTCATCCCCAAGGTCCTGGCCATC---------TTCTGGTTTGACCTCAGGTCCATCAGCTTCTCTGCCTGCTTCCTGCAGATGTTCATCATGAACAGTTTTTTAACCATGGAGTCCTGCarollia_castaneaTTCATGGTCATGGCCTATGACCGCTATGTGGCCATCTGCCACCCACTAAGATACCCATCCATCATCACTGATCAATTTGTG------GCTAGAGCTACCATGTTTGTTGTAGCCCGGAATGCCCTACTTTTTCTTCCTGTTCCAGTCCTGTCTTCTCGACTCAGATACTGTGCAGAGAACATCATCAAGAACTGCATC---------------TGCACTAACCTGTCTGTGTCCAGACTCTCCTGT---------GATGACATCACCTTCAACCGGCTCTACCAGTTTGTGACAGGCTGGACCCTGCTGGGCTCTGATCTCATCCTTATTGTTCTCTCCTACTCCTTCATCCTGAAAGCTGTGCTAAAG---------------------------------------ATCAAGGCTGAGGGTGCTGCAGCCAAGGCCCTGAGCACCTGTGGTTCTCACTTCATCCTCATCCTCTTCTTCAGCarollia_castaneaGTCCTGCTGGTTCTGGTCATCACCAACCTGGCCAGGAAGAGAATCCCCCCAGATGTCCCCATCCTGCTCAACATCCTGCAC---CACCTGATCCCCCCAGCTCTGAACCCCATTGTTTATGGTGTGAGAACCAAGGAGATCAAGCAGGGAATCCTGAAACTACTG---AGG---------------------------AGTCTG------------------------------------------
LS073_Carollia_sowelli_mybaits_NODE_31_length_1301_cov_89.763889|OR56 ATGGCCTCACCCAGCAACTACTCCACTGCTCCAGTCTCTGAATTCCTCCTCATCTGCTTCCCTAACTACCAGAGTTGGCAGCACTGGCTGTCCCTGCCCCTCAGCCTCCTATTC---CTCCTGGCCATGGGGGCCAATGCCACCCTTCTGATCACCATCTGGCTGGAGGCTTCTCTGCATGAGCCCATGTACTACCTGCTCAGCCTCCTCTCCCTGCTGGACATTGTGCTCTGCCTCACTGTCATCCCCAAGGTCCTGGCCATC---------TTCTGGTTTGACCTCAGGTCCATCAGCTTCTCTGCCTGCTTCCTGCAGATGTTCATCATGAACAGTTTTTTAACCATGGAGTCCTGCarollia_castaneaTTCATGGTCATGGCCTATGACCGCTATGTGGCCATCTGCCACCCACTAAGATACCCATCCATCATCACTGATCAATTTGTG------GCTAGAGCTACCATGTTTGTTGTAGCCCGGAATGCCCTACTTTTTCTTCCTGTTCCAGTCCTGTCTTCTCGACTCAGATACTGTGCAGAGAACATCATCAAGAACTGCATC---------------TGCACTAACCTGTCTGTGTCCAGACTCTCCTGT---------GATGACATCACCTTCAACCGGCTCTACCAGTTTGTGACAGGCTGGACCCTGCTGGGCTCTGATCTCATCCTTATTGTTCTCTCCTACTCCTTCATCCTGAAAGCTGTGCTAAGG---------------------------------------ATCAAGGCTGAGGGTGCTGCAGCCAAGGCTCTGAGCACCTGTGGTTCTCACTTCATCCTCATCCTCTTCTTCAGCarollia_castaneaGTCCTGCTGGTTCTGGTCATCACCAACCTGGCCAGGAAGAGAATCCCCCCAGATGTCCCCATCCTGCTCAACATCCTGCAC---CACCTGATCCCCCCAGCTCTGAACCCCATTGTTTATGGTGTGAGAACCAAGGAGATCAAGCAGGGAATCCTGAAACTACTG---AGG---------------------------AGTCTG------------------------------------------
LS073_Carollia_sowelli_mybaits_NODE_30_length_1384_cov_80.316756|OR56 ATGACTTCACCCAGCAACTACTCCACTGCTCCAGTCTCTGAATTCCTCCTCATCTGCTTCCCTAACTACCAGAGTTGGCAGCACTGGCTGTCCCTGCCCCTCAGCCTCCTATTC---CTCCTGGCCATGGGGGCCAATGCCACCCTTCTGATCACCATCTGGCTGGAGGCTTCTCTGCATGAGCCCATGTACTACCTGCTCAGCCTCCTCTCCCTGCTGGACATTGTGCTCTGCCTCACTGTCATCCCCAAGGTCCTGGCCATC---------TTCTGGTTTGACCTCAGGTCCATCAGCTTCTCTGCCTGCTTCCTGCAGATGTTCATCATGAACAGTTTTTTAACCATGGAGTCCTGCarollia_castaneaTTCATGGTCATGGCCTATGACCGCTATGTGGCCATCTGCCACCCACTAAGATACCCATCCATCATCACTGATCAATTTGTG------GCTAGAGCTACCATGTTTGTTGTAGCTCGGAATGCCCTGCTTTTTCTTCCTGTTCCAGTCCTGTCTTCTCGACTCAGATACTGTGCAGAGAACATCATCAAGAACTGCATC---------------TGCACTAACCTGTCTGTGTCCAGACTCTCCTGT---------GATGACATCACCTTCAACCGGCTCTACCAGTTTGTGACAGGCTGGACCCTGCTGGGCTCTGATCTCATCCTTATTGTTCTCTCCTACTCCTTCATCCTGAAAGCTGTGCTAAAG---------------------------------------ATCAAGGCTGAGGGTGCTGCAGCCAAGGCCCTGAGCACTTGTGGTTCTCACTTCATACTCATCCTCTTCTTCAGCarollia_castaneaGTCCTGCTGGTTCTGGTCATCACCAACCTGGCCAGGAAGAGAATCCCCCCAGATGTCCCCATCCTGCTCAACATCCTGCAC---CACCTGATCCCCCCAGCTCTGAACCCCATTGTTTATGGTGTGAGAACCAAGGAGATCAAGCAGGGAATCCTGAAACTACTG---AGC---------------------------AGTCTG------------------------------------------
LS073_Carollia_sowelli_mybaits_NODE_9_length_1134_cov_187.592242|OR56 ---------------------------------------------------------------------------------------------------------------------------------------------------------------------------------------------------------------------------------------------------------------CTGGCCATC---------TTCTGGTTTGACCTCAGGTCCATCAGCTTCTCTGCCTGCTTCCTGCAGATGTTCATCATGAACAGTTTTTTAACCATGGAGTCCTGCarollia_castaneaTTCATGGTCATGGCCTATGACCGCTATGTGGCCATCTGCCACCCACTAAGATACCCATCCATCATCACTGATCAATTTGTG------GCTAGAGCTACCATGTTTGTTGTAGCCCGGAATGCCCTACTTTTTCTTCCTGTTCCAGTCCTGTCTTCTCGACTCAGATACTGTGCAGAGAACATCATCAAGAACTGCATC---------------TGCACTAACCTGTCTGTGTCCAGACTCTCCTGT---------GATGACATCACCTTCAACCGGCTCTACCAGTTTGTGACAGGCTGGACCCTGCTGGGCTCTGATCTCATCCTTATTGTTCTCTCCTACTCCTTCATCCTGAAAGCTGTGCTAAGG---------------------------------------ATCAAGGCTGAGGGTGCTGCAGCCAAGGCTCTGAGCACCTGTGGTTCTCACTTCATCCTCATCCTCTTCTTCAGCarollia_castaneaGTCCTGCTGGTTCTGGTCATCACCAACCTGGCCAGGAAGAGAATCCCCCCAGATGTCCCCATCCTGCTCAACATCCTGCAC---CACCTGATCCCCCCAGCTCTGAACCCCATTGTTTATGGTGTGAGAACCAAGGAGATCAAGCAGGGAATCCTGAAACTACTG---AGG---------------------------AGTCTG------------------------------------------
LS073_Carollia_sowelli_mybaits_NODE_4_length_1715_cov_164.932234|OR56 ATGGCCTCACCCAGCAACTACTCCACTGCTCCAGTCTCTGAATTCTTCCTCATCTGCTTCCCTAACTACCAGAGTTGGCAGCACTGGCTGTCCCTGCCCCTCAGCCTCCTATTC---CTCCTGGCCATGGGGGCCAATGCCACCCTTCTGATCACCATCTGGCTGGAGGCTTCTCTGCATGAGCCCATGTACTACCTGCTCAGCCTCCTCTCCCTGCTGGACATTGTGCTCTGCCTCACTGTCATCCCCAAGGTCCTGGCCATC---------TTCTGGTTTGACCTCAGGTCCATCAGCTTCTCTGCATGCTTCCTCCAAATGTTTATCATGAATTGCTTCCTTGCCATGGAGTCCTGCarollia_castaneaTTCATGGTCATGGCCTATGACCGCTATGTGGCCATCTGCCACCCACTAAGATACCCATCCATCATCACTGATCAATTTGTG------GCTAGAGCTACCATGTTTGTTGTAGCCCGGAATGCCCTACTTTTTCTTCCTGTTCCAGTCCTGTCTTCTCGACTCAGATACTGTGCAGAGAACATCATCAAGAACTGCATC---------------TGCACTAACCTGTCTGTGTCCAGACTCTCCTGT---------GATGACATCACCTTCAACCGGCTCTACCAGTTTGTGACAGGCTGGACCCTGCTGGGCTCTGATCTCATCCTTATTGTTCTCTCCTACTCCTTCATCCTGAAAGCTGTGCTAAGG---------------------------------------ATCAAGGCTGAGGGTGCTGCAGCCAAGGCTCTGAGCACCTGTGCTTCTCACTTCATCCTCATCCTCTTCTTCAGCarollia_castaneaGTCCTGCTGGTTCTGGTCATCACCAACCTGGCCAGGAAGAGAATCCCCCCAGATGTCCCCATCCTGCTCAACATCCTGCAC---CACCTGATCCCCCCAGCTCTGAACCCCATTGTTTATGGTGTGAGAACCAAGGAGATCAAGCAAGGAATTCAGAAATTGCTG---AGG---------------------------AGTCTG------------------------------------------
LS084_Carollia_castanea_mybaits_NODE_3_length_2051_cov_41.391591|OR56 ATGACTTCACCCAGCAACGGCTCCACTGCTCCAGTCTCTGAATTCTTCCTCATCTGCTTCCCTAACTACCAGAGTTGGCAGCACTGGCTGTCCCTGCCCCTCAGCCTCCTATTC---CTCCTGGCCATGGGGGCCAATGCCACCCTTCTGATCACCATCCGGCTGGAGGCATCTCTGCATGAGCCCATGTACTACCTGCTCAGCCTCCTCTCCCTGCTGGACATTGTGCTCTGCCTCACTGTCATCCCCAAGGTCCTGGCCATC---------TTCTGGTTTGACCTCAGGTCCATCAGCTTCTCTGCCTGCTTCCTGCAGATGTTCATCATGAATTGCTTCCTTGCCATGGAGTCCTGCarollia_castaneaTTCATGGTCATGGCCTATGACCGCTATGTGGCCATCTGCCACCCACTACGATACCCATCCATCATCACTGATCAATTTGTG------GCTAGAGCTACCATGTTTATTGTAGCCCGGAATGCCCTGTTTTTTCTTCCTGTTCCAGTCCTGTCTTCTCGACTCAGATACTGTGCAGAGAACATCATCAAGAACTGCATC---------------TGCGCTAACCTGTCTGTGTCCAAACTCTCCTGT---------GATGACATCACCTTGAACCGGCTCTACCAGTTTGTGACAGGCTGGACCCTACTGGGCTCTGATCTCATCCTTATTGTTCTCTCCTACTCCTTCATCCTGAAAGCTGTGCTAAGG---------------------------------------ATCAAGGCTGAGGGTGCTGCAGCCAAGGCTCTGAGCACCTGTGCTTCTCACTTCATCCTCATCCTCTTCTTCAGCarollia_castaneaATCCTGCTGGTTCTGGTCATCACCAACCTGGCCAGGAAGAGAATCCCCCCAGATGTCCCCATCCTGCTCAACATCCTGCAC---CACCTGATCCCCCCAGCTCTGAACCCCATTGTTTATGGTGTGAGAACCAAGGAGATCAAGCAAGGAATTCAGAAATTGCTG---AGG---------------------------AGTCTG------------------------------------------
LS084_Carollia_castanea_mybaits_NODE_79_length_1339_cov_8.912837|OR56 ---ACTTCACCCAGCAACGGCTCCACTGCTCCAGTCTCTGAATTCTTCCTCATCTGCTTCCCTAACTACCAGAGTTGGCAGCACTGGCTGTCCCTGCCCCTCAGCCTCCTATTC---CTCCTGGCCATGGGGGCCAATGCCACCCTTCTGATCACCATCCGGCTGGAGGCATCTCTGCATGAGCCCATGTACTACCTGCTCAGCCTCCTCTCCCTGCTGGACATTGTGCTCTGCCTCACTGTCATCCCCAAGGTCCTAGCCATC---------TTCTGGTTTGACCTCAGGTCCATCAGCTTCTCTGCCTGCTTCCTCCAAATGTTCATCATGAATTGCTTCCTTGCCATGGAGTCCTGCarollia_castaneaTTCATGGTCATGGCCTATGACCGCTATGTGGCCATCTGCCACCCACTACGATACCCATCCATCATCACTGATCAATTTGTG------GCTAGAGCTACCATGTTTATTGTAGCCCGGAATGCCCTGTTTTTTCTTCCTGTTCCAGTCCTGTCTTCTCGACTCAGATACTGTGCAGAGAACATCATCAAGAACTGCATC---------------TGCGCTAACCTGTCTGTGTCCAAACTCTCCTGT---------GATGACATCACCTTGAACCGGCTCTACCAGTTTGTGACAGGCTGGACCCTACTGGGCTCTGATCTCATCCTTATTGTTCTCTCCTACTCCTTCATCCTGAAAGCTGTGCTAAGG---------------------------------------ATCAAGGCTGAGGGTGCTGCAGCCAAGGCTCTGAGCACCTGTGCTTCTCACTTCATCCTCATCCTCTTCTTCAGCarollia_castaneaATCCTGCTGGTTCTGGTCATCACCAACCTGGCCAGGAAGAGAATCCCCCCAGATGTCCCCATCCTGCTCAACATCCTGCAC---------------------------------------------------------------------------------------------------------------------------------------------------------------------
LS084_Carollia_castanea_mybaits_NODE_90_length_1225_cov_10.491289|OR56 ---ACTTCACCCAGCAACGGCTCCACTGCTCCAGTCTCTGAATTCTTCCTCATCTGCTTCCCTAACTACCAGAGTTGGCAGCACTGGCTGTCCCTGCCCCTCAGCCTCCTATTC---CTCCTGGCCATGGGGGCCAATGCCACCCTTCTGATCACCATCTGGCTGGAGGCATCTCTGCATGAGCCCATGTACTACCTGCTCAGCCTCCTCTCCCTGCTGGACATTGTGCTCTGCCTCACTGTCATCCCCAAGGTCCTGGCCATC---------TTCTGGTTTGACCTCAGGTCCATCAGCTTCTCTGCCTGCTTCCTGCAGATGTTCATCATGAATTGCTTCCTTGCCATGGAGTCCTGCarollia_castaneaTTCATGGTCATGGCCTATGACCGCTATGTGGCCATCTGCCACCCACTACGATACCCATCCATCATCACTGATCAATTTGTG------GCTAGAGCTACCATGTTTATTGTAGCCCGGAATGCCCTGTTTTTTCTTCCTGTTCCAGTCCTGTCTTCTCGACTCAGATACTGTGCAGAGAACATCATCAAGAACTGCATC---------------TGCGCTAACCTGTCTGTGTCCAAACTCTCCTGT---------GATGACATCACCTTGAACCGGCTCTACCAGTTTGTGACAGGCTGGACCCTACTGGGCTCTGATCTCATCCTTATTGTTCTCTCCTACTCCTTCATCCTGAAAGCTGTGCTAAGG---------------------------------------ATCAAGGCTGAGGGTGCTGCAGCCAAGGCTCTGAGCACCTGTGCTTCTCACTTCATCCTCATCCTCTTCTTCAGCarollia_castaneaATCCTGCTGGTTCTGGTCATCACCAACCTGGCCAGGAAGAGAATCCCCCCAGATGTCCCCATCCTGCTCAACATCCTGCAC---------------------------------------------------------------------------------------------------------------------------------------------------------------------
LS084_Carollia_castanea_mybaits_NODE_78_length_1459_cov_8.996382|OR56 ---ACTTCACCCAGCAACGGCTCCACTGCTCCAGTCTCTGAATTCTTCCTCATCTGCTTCCCTAACTACCAGAGTTGGCAGCACTGGCTGTCCCTGCCCCTCAGCCTCCTATTC---CTCCTGGCCATGGGGGCCAATGCCACCCTTCTGATCACCATCCGGCTGGAGGCATCTCTGCATGAGCCCATGTACTACCTGCTCAGCCTCCTCTCCCTGCTGGACATTGTGCTCTGCCTCACTGTCATCCCCAAGGTCCTAGCCATC---------TTCTGGTTTGACCTCAGGTCCATCAGCTTCTCTGCCTGCTTCCTCCAAATGTTCATCATGAATTGCTTCCTTGCCATGGAGTCCTGCarollia_castaneaTTCATGGTCATGGCCTATGACCGCTATGTGGCCATCTGCCACCCACTACGATACCCATCCATCATCACTGATCAATTTGTG------GCTAGAGCTACCATGTTTATTGTAGCCCGGAATGCCCTGTTTTTTCTTCCTGTTCCAGTCCTGTCTTCTCGACTCAGATACTGTGCAGAGAACATCATCAAGAACTGCATC---------------TGCGCTAACCTGTCTGTGTCCAAACTCTCCTGT---------GATGACATCACCTTGAACCGGCTCTACCAGTTTGTGACAGGCTGGACCCTACTGGGCTCTGATCTCATCCTTATTGTTCTCTCCTACTCCTTCATCCTGAAAGCTGTGCTAAGG---------------------------------------ATCAAGGCTGAGGGTGCTGCAGCCAAGGCTCTGAGCCCCTGTGCTTCTCACTTCATCCTCATCCTCTTCTTCAGCarollia_castaneaATCCTGCTGGTTCTGGTCATCACCAACCTGGCCAGGAAGAGAATCCCCCCAGAGGTCCCCATCCTG------------------------------------------------------------------------------------------------------------------------------------------------------------------------------------
LS084_Carollia_castanea_mybaits_NODE_4_length_1936_cov_49.305003|OR56 ATGGCATCACCCAGCAACTACTCCACTGCTCCAGTCTCTGAATTTCTACTCATCTGCTTCCCTAGCTACCAGAGTTGGCAGCACTGGCTGTCCCTGCCCCTCAGCCTCCTATTC---CTCCTGGCCATGGGGGCCAATGCCACCCTTCTGATCACCATCCGGCTGGAGGCATCTCTGCATGAGCCCATGTACTACCTGCTCAGCCTCCTCTCCCTGCTGGACATTGTGCTCTGCCTCACTGTCATCCCCAAGGTCCTGGCCATC---------TTCTGGTTTGACCTCAGGTCCATCAGCTTCTCTGCCTGCTTCCTGCAGATGTTCATCATGAATTGCTTCCTTGCCATGGAGTCCTGCarollia_castaneaTTCATGGTCATGGCCTATGACCGCTATGTGGCCATCTGCCACCCACTACGATACCCATCTATCATCACTGATCAATTTGTG------GCTAGAGCTACCATGTTTATTGTAGCCCGGAATGCCCTGCTTTTTCTTCCTGTTCCAGTCCTGTCTTCTCGACTCAGATACTGTGCAGAGAACATCATCAAGAACTGCATC---------------TGCACTAACCTGTCTGTGTCCAGACTCTCCTGT---------GATGACATCACCTTGAACCGGCTCTACCAGTTTGTGACAGGCTGGACCCTACTGGGCTCTGATCTCATCCTTATTGTTCTCTCCTACTCCTTCATCCTGAAAGCTGTGCTAAGG---------------------------------------ATCAAGGCTGAGGGTGCTGCAGCCAAGGCTCTGAGCACTTGTGGTTCTCACTTCATCCTCATCCTCTTCTTCAGCarollia_castaneaGTCCTGCTGGTTCTGGTCATCACCAACCTGGCCAGGAAGAGAATCCCCCCAGATGTCCCCATCCTGCTCAACATCCTGCAC---CACCTGATCCCCCCAGCTCTGAACCCCATTGTTTATGGTGTGAGAACCAAGGAGATCAAGCAAGGAATCCTGAAACTACTG---AGG---------------------------AGTCTG------------------------------------------
LS084_Carollia_castanea_mybaits_NODE_9_length_1153_cov_50.156134|OR56 ------------------------------------------------------------------------------------------------------------------------------------------------------------------------------------------------------------------------------------------------GTCATCCCCAAGGTCCTGGCCATC---------TTCTGGTTTGACCTCAGGTCCATCAGCTTCTCTGCCTGCTTCCTGCAGATGTTCATCATGAATTGCTTCCTTGCCATGGAGTCCTGCarollia_castaneaTTCATGGTCATGGCCTATGACCGCTATGTGGCCATCTGCCACCCACTACGATACCCATCTATCATCACTGATCAATTTGTG------GCTAGAGCTACCATGTTTATTGTAGCCCGGAATGCCCTGCTTTTTCTTCCTGTTCCAGTCCTGTCTTCTCGACTCAGATACTGTGCAGAGAACATCATCAAGAACTGCATC---------------TGCACTAACCTGTCTGTGTCCAGACTCTCCTGT---------GATGACATCACCTTGAACCGGCTCTACCAGTTTGTGACAGGCTGGACCCTACTGGGCTCTGATCTCATCCTTATTGTTCTCTCCTACTCCTTCATCCTGAAAGCTGTGCTAAGG---------------------------------------ATCAAGGCTGAGGGTGCTGCAGCCAAGGCTCTGAGCACTTGTGGTTCTCACTTCATCCTCATCCTCTTCTTCAGCarollia_castaneaGTCCTGCTGGTTCTGGTCATCACCAACCTGGCCAGGAAGAGAATCCCCCCAGATGTCCCCATCCTGCTCAACATCCTGCAC---CACCTGATCCCCCCAGCTCTGAACCCCATTGTTTATGGTGTGAGAACCAAGGAGATCAAGCAGGGGATCCTGAAACTACTG---AGG---------------------------AGTCTG------------------------------------------
LS084_Carollia_castanea_mybaits_NODE_29_length_1538_cov_25.496920|OR56 ATGACTTCACCCAGCAACGGCTCCACTGCTCCAGTCTCTGAATTCTTCCTCATCTGCTTCCCTAACTACCAGAGTTGGCAGCACTGGCTGTCCCTGCCCCTCAGCCTCCTATTC---CTCCTGGCCATGGGGGCCAATGCCACCCTTCTGATCACCATCCGGCTGGAGGCATCTCTGCATGAGCCCATGTACTACCTGCTCAGCCTCCTCTCCCTGCTGGACATTGTGCTCTGCCTCACTGTCATCCCCAAGGTCCTGGCCATC---------TTCTGGTTTGACCTCAGGTCCATCAGCTTCTCTGCCTGCTTCCTGCAGATGTTCATCATGAATTGCTTCCTTGCCATGGAGTCCTGCarollia_castaneaTTCATGGTCATGGCCTATGACCGCTACGTGGCCATCTGCCACCCACTACGATACCCATCTATCATCACTGATCAATTTGTG------GCTAGAGCTACCATGTTTATTGTAGCCCGGAATGCCCTGCTTTTTCTTCCTGTTCCAGTCCTGTCTTCTCGACTCAGATACTGTGCAGAGAACATCATCAAGAACTGCATC---------------TGCACTAACCTGTCTGTGTCCAGACTCTCCTGT---------GATGACATCACCTTGAACCGGCTCTACCAGTTTGTGACAGGCTGGACCCTACTGGGCTCTGATCTCATCCTTATTGTTCTCTCCTACTCCTTCATCCTGAAAGCTGTGCTAAGG---------------------------------------ATCAAGGCTGAGGGTGCTGCAGCCAAGGCCCTGAGCACTTGTGGTTCTCACTTCATCCTCATCCTCTTCTTCAGCarollia_castaneaGTCCTGCTGGTTCTGGTCATCACCAACCTGGCCAGGAAGAGAATCCCCCCAGATGTCCCCATCCTGCTCAACATCCTGCAC---CACCTGATCCCCCCAGCTCTGAACCCCATTGTTTATGGTGTGAGAACCAAGGAGATCAAGCAGGGGATCCTGAAACTACTG---AGG---------------------------AGTCTG------------------------------------------
LS084_Carollia_castanea_mybaits_NODE_35_length_633_cov_19.496403|OR56 ---------------------------------------------------------------------------------------------------------------------------------------------------------------------------------------------------------------------------------------------------ATCCCCAAGGTCCTGGCCATC---------TTCTGGTTTGACCTCAGGTCCATCAGCTTCTCTGCCTGCTTCCTGCAGATGTTCATCATGAATTGCTTCCTTGCCATGGAGTCCTGCarollia_castaneaTTCATGGTCATGGCCTATGACCGCTACGTGGCCATCTGCCACCCACTACGATACCCATCTATCATCACTGATCAATTTGTG------GCTAGAGCTACCATGTTTATTGTAGCCCGGAATGCCCTGCTTTTTCTTCCTGTTCCAGTCCTGTCTTCTCGACTCAGATACTGTGCAGAGAACATCATCAAGAACTGCATC---------------TGCACTAACCTGTCTGTGTCCAGACTCTCCTGT---------GATGACATCACCTTGAACCGGCTCTACCAGTTTGTGACAGGCTGGACCCTACTGGGCTCTGATCTCATCCTTATTGTTCTCTCCTACTCCTTCATCCTGAAAGCTGTGCTAAGG---------------------------------------ATCAAGGCTGAGGGTGCTGCAGCCAAGGCCCTGAGCACTTGTGGTTCTCACTTCATCCTCATCCTCTTCTTCAGCACGGTCCTGCTGGTTCTGGTCATCACCAACCTGGCCAGGAAGAGAATCCCCCCAGATGTCCCCATCCTGCTCAACATCCTGCAC---CACCTGATCCCCCCAGCTCTG---------------------------------------------------------------------------------------------------------------------------------------------
LS073_Carollia_sowelli_mybaits_NODE_40_length_651_cov_57.301394|OR56 ------------------------------------------------------------------------------------------------------------------------------------------------------------------------------------------------------------------------------------------------------------------GCCATC---------TTCTGGTTTGACCTCAGGTCCATCAGCTTCTCTGCCTGCTTCCTGCAGATGTTCATCATGAACAGTTTTTTAACCATGGAGTCCTGCarollia_castaneaTTCATGGTCATGGCCTATGACCGCTATGTGGCCATCTGCCACCCACTAAGATACCCATCCATCATCACTGATCAATTTGTG------GCTAGAGCTACCATGTTTGTTGTAGCCCGGAATGCCCTACTTTTTCTTCCTGTTCCAGTCCTGTCTTCTCGACTCAGATACTGTGCAGAGAACATCATCAAGAACTGCATC---------------TGCACTAACCTGTCTGTGTCCAGACTCTCCTGT---------GATGACATCACCTTCAACCGGCTCTACCAGTTTGTGACAGGCTGGACCCTGCTGGGCTCTGATCTCATCCTTATTGTTCTCTCCTACTCCTTCATCCTGAAAGCTGTGCTAAGG---------------------------------------ATCAAGGCTGAGGGTGCTGCAGCCAAGGCTCTGAGCACCTGTGCTTCTCACTTCATCCTCATCCTCTTCTTCAGCarollia_castaneaGTCCTGCTGGTTCTGGTCATCACCAACCTGGCCAGGAAGAGAATCCCCCCAGATGTCCCCATCCTGCTCAACATCCTGCAC---CACCTGATCCCCCCAGCTCTGAACCCCATTGTTTATGGTGTGAGAACCAAGGAG------------------------------------------------------------------------------------------------------------
LS084_Carollia_castanea_mybaits_NODE_3_length_2344_cov_17.159241|OR56 ---GCATCACCCAGCAACTACTCCACTGCTCCAGTCTCTGAATTTCTACTCATCTGCTTCCCTAGCTACCAGAGTTGGCAGCACTGGCTGTCCCTGCCCCTCAGCCTCCTATTC---CTCCTGGCCATGGGGGCCAATGCCACCCTTCTGATCACCATCCGGCTGGAGGCATCTCTGCATGAGCCCATGTACTACCTGCTCAGCCTCCTCTCCCTGCTGGACATTGTGCTCTGCCTCACTGTCATCCCCAAGGTCCTGGCCATC---------TTCTGGTTTGACCTCAGGTCCATCAGCTTCTCTGCCTGCTTCCTGCAGATGTTCATCATGAATTGCTTCCTTGCCATGGAGTCCTGCarollia_castaneaTTCATGGTCATGGCCTATGACCGCTATGTGGCCATCTGCCACCCACTACGATACCCATCCATCATCACTGATCAATTTGTG------GCTAGAGCTACCATGTTTATTGTAGCCCGGAATGCCCTGTTTTTTCTTCCTGTTCCAGTCCTGTCTTCTCGACTCAGATACTGTGCAGAGAACATCATCAAGAACTGCATC---------------TGCGCTAACCTGTCTGTGTCCAAACTCTCCTGT---------GATGACATCACCTTGAACCGGCTCTACCAGTTTGTGACAGGCTGGACCCTACTGGGCTCTGATCTCATCCTTATTGTTCTCTCCTACTCCTTCATCCTGAAAGCTGTGCTAAGG---------------------------------------ATCAAGGCTGAGGGTGCTGCAGCCAAGGCTCTGAGCACCTGTGCTTCTCACTTCATCCTCATCCTCTTCTTCAGCarollia_castaneaATCCTGCTGGTTCTGGTCATCACCAACCTGGCCAGGAAGAGAATCCCCCCAGATGTCCCCATCCTGCTCAACATCCTGCAC---CACCTGATCCCCCCAGCTCTGAACCCCATTGTTTATGGTGTGAGAACCAAGGAGATC---------------------------------------------------------------------------------------------------------
LS070_Carollia_perspicillata_mybaits_NODE_27_length_1368_cov_100.660728|OR56 ---GCCTCACCCAGCAACGACTCCACTGCTCCAGTTTCTGAATTCCTCCTCATCTGCTTCCCTAACTACCAGAGTTGGCAGCACTGGCTGTCCCTGCCCCTCAGCCTCCTATTC---CTCCTGGCCATGGGGGCCAATGCCACCCTTCTGATCACCATCTGGCTGGAGGCTTCTCTGCATGAGCCCATGTACTACCTGCTCAGCCTCCTCTCCCTGCTGGACATTGTGCTCTGCCTCACTGTCATCCCCAAGGTCCTGGCCATC---------TTCTGGTTTGACCTCAGGTCCATCAGCTTCTCTGCATGCTTCCTGCAGATGTTCATCATGAACAGTTTTTTAGCCATGGAGTCCTGCarollia_castaneaTTCATGGTCATGGCCTATGACCGCTATGTGGCCATCTGCCACCCACTAAGATACCCATCCATCATCACTGATCAATTTGTG------GCTAGAGCTACCATGTTTGTTGTAGCCCGGAATGCCCTGCTTTTTCTTCCTGTTCCAGTCCTGTCTTCTCGACTCAGATACTGTGCAGAGAACATCATCAAGAACTGCATC---------------TGCACTAACCTGTCTGTGTCCAGACTCTCCTGT---------GATGACATCACCTTCAACCGGCTCTACCAGTTTGTGACAGGCTGGACCCTGCTGGGCTCTGATCTCATCCTTATTGTTCTCTCCTACTCCTTCATCCTGAAAGCTGTGCTAAAG---------------------------------------ATCAAGGCTGAGGGTGCTGCAGCCAAGGCCCTGAGCACCTGTGGTTCTCACTTCATCCTCATCCTCTTCTTCAGCarollia_castaneaGTCCTGCTGGTTCTGGTCATCACCAACCTGGCCAGGAAGAGAATCCCCCCAGATGTCCCCATCCTGCTCAACATCCTGCAC---------------------------------------------------------------------------------------------------------------------------------------------------------------------
LS070_Carollia_perspicillata_mybaits_NODE_30_length_1163_cov_131.345304|OR56 ---ACTTCACCCAGCAACTACTCCACTGCTCCAGTCTCTGATTTCCTCCTCATATGCTTCCCTAACTACCAGAGTTGGCAGCACTGGCTGTCCCTGCCCCTCAGCCTCCTATTC---CTCCTGGCCATGGGGGCCAATGCCACCCTTCTGATCACCATCTGGCTGGAGGCATCTCTGCATGAGCCCATGTACTACCTGCTCAGCCTCCTCTCCCTGCTGGACATTGTGCTCTGCCTCACTGTCATCCCCAAGGTCCTGGCCATC---------TTCTGGTTTGACCTCAGGTCCATCAGCTTCTCTGCCTGCTTCCTGCAGATGTTCATCATGAATTGCTTCCTTGCCATGGAGTCCTGCarollia_castaneaTTCATGGTCATGGCCTATGACCGCTATGTGGCCATCTGCCACCCACTAAGATACCCATCCATCATCACTGATCAATTTGTG------GCTAGAGCTACCATGTTTGTTGTAGCTCGGAATGCCCTGCTTTCTCTTCCTGTTCCAGTCCTGTCTTCTCGACTCAGATACTGTGCAGAGAACATCATCAAGAACTGCATC---------------TGCACTAACCTGTCTGTGTCCAGACTCTCCTGT---------GATGACATCACCTTCAACCGGCTCTACCAGTTTGTGACAGGCTGGACCCTGCTGGGCTCTGATCTCATCCTTATTGTTCTCTCCTACTCCTTCATCCTGAAAGCTGTGCTAAAG---------------------------------------ATCAAGGCTGAGGGTGCTGCAGCCAAGGCCCTGAGCACCTGTGGTTCTCACTTCATCCTCATCCTCTTCTTCAGCarollia_castaneaGTCCTGCTGGTTCTGGTCATCACCAACCTGGCCAGGAAGAGAATCCCCCCAGATGTCCCCATCCTGCTCAACATCCTGCAC---CAC---------------------------------------------------------------------------------------------------------------------------------------------------------------
LS070_Carollia_perspicillata_mybaits_NODE_31_length_1122_cov_138.049761|OR56 ---ACTTCACCCAGCAACTACTCCACTGCTCCAGTCTCTGATTTCCTCCTCATATGCTTCCCTAACTACCAGAGTTGGCAGCACTGGCTGTCCCTGCCCCTCAGCCTCCTATTC---CTCCTGGCCATGGGGGCCAATGCCACCCTTCTGATCACCATCTGGCTGGAGGCATCTCTGCATGAGCCCATGTACTACCTGCTCAGCCTCCTCTCCCTGCTGGACATTGTGCTCTGCCTCACTGTCATCCCCAAGGTCCTGGCCATC---------TTCTGGTTTGACCTCAGGTCCATCAGCTTCTCTGCCTGCTTCCTGCAGATGTTCATCATGAATTGCTTCCTTGCCATGGAGTCCTGCarollia_castaneaTTCATGGTCATGGCCTATGACCGCTATGTGGCCATCTGCCACCCACTAAGATACCCATCCATCATCACTGATCAATTTGTG------GCTAGAGCTACCATGTTTGTTGTAGCCCGGAATGCCCTGCTTTTTCTTCCTGTTCCAGTCCTGTCTTCTCGACTCAGATACTGTGCAGAGAACATCATCAAGAACTGCATC---------------TGCACTAACCTGTCTGTGTCCAGACTCTCCTGT---------GATGACATCACCTTCAACCGGCTCTACCAGTTTGTGACAGGCTGGACCCTGCTGGGCTCTGATCTCATCCTTATTGTTCTCTCCTACTCCTTCATCCTGAAAGCTGTGCTAAAG---------------------------------------ATCAAGGCTGAGGGTGCTGCAGCCAAGGCCCTGAGCACCTGTGGTTCTCACTTCATCCTCATCCTCTTCTTCAGCarollia_castaneaGTCCTGCTGGTTCTGGTCATCACCAACCTGGCTAGGAAGAGAATCCCCCCAGATGTCCCCATCCTGCTCAACATCCTGCAC---CACCTG------------------------------------------------------------------------------------------------------------------------------------------------------------
LS070_Carollia_perspicillata_mybaits_NODE_33_length_1099_cov_118.829746|OR56 ---GCCTCACCCAGCAACTACTCCACTGCTCCAGTTTCTGATTTCCTCCTCATCTGCTTCCCTAACTACCAGAGTTGGCAGCACTGGCTGTCCCTGCCCCTCAGCCTCCTATTC---CTCCTGGCCATGGGGGCCAATGCCACCCTTCTGATCACCATCTGGCTGGAGGCATCTCTGCATGAGCCCATGTACTACCTGCTCAGCCTCCTCTCCCTGCTGGACATTGTGCTCTGCCTCACTGTCATCCCCAAGGTCCTGGCCATC---------TTCTGGTTTGACCTCAGGTCCATCAGCTTCTCTGCCTGCTTCCTGCAGATGTTCATCATGAATTGCTTCCTTGCCATGGAGTCCTGCarollia_castaneaTTCATGGTCATGGCCTATGACCGCTATGTGGCCATCTGCCACCCACTAAGATACCCATCCATCATCACTGATCAATTTGTG------GCTAGAGCTACCATGTTTGTTGTAGCTCGGAATGCCCTGCTTTCTCTTCCTGTTCCAGTCCTGTCTTCTCGACTCAGATACTGTGCAGAGAACATCATCAAGAACTGCATC---------------TGCACTAACCTGTCTGTGTCCAGACTCTCCTGT---------GATGACATCACCTTCAACCGGCTCTACCAGTTTGTGACAGGCTGGACCCTGCTGGGCTCTGATCTCATCCTTATTGTTCTCTCCTACTCCTTCATCCTGAAAGCTGTGCTAAAG---------------------------------------ATCAAGGCTGAGGGTGCTGCAGCCAAGGCCCTGAGCACTTGTGGTTCTCACTTCATCCTCATCCTCTTCTTCAGCarollia_castaneaGTCTTGCTGGTTCTGGTCATCACCAACCTGGCCAGGAAGAGAATCCCCCCAGATGTCCCCATCCTGCTCAACATCCTGCAC---CACCTG------------------------------------------------------------------------------------------------------------------------------------------------------------
LS070_Carollia_perspicillata_mybaits_NODE_84_length_1109_cov_36.804264|OR56 ---GCCTCACCCAGCAACTACTCCACTGCTCCAGTTTCTGATTTCCTCCTCATCTGCTTCCCTAACTACCAGAGTTGGCAGCACTGGCTGTCCCTGCCCCTCAGCCTCCTATTC---CTCCTGGCCATGGGGGCCAATGCCACCCTTCTGATCACCATCTGGCTGGAGGCATCTCTGCATGAGCCCATGTACTACCTGCTCAGCCTCCTCTCCCTGCTGGACATTGTGCTCTGCCTCACTGTCATCCCCAAGGTCCTGGCCATC---------TTCTGGTTTGACCTCAGGTCCATCAGCTTCTCTGCATGCTTCCTGCAGATGTTCATCATGAATTGCTTCCTTGCCATGGAGTCCTGCarollia_castaneaTTCATGGTCATGGCCTATGACCGCTATGTGGCCATCTGCCACCCACTAAGATACCCATCCATCATCACTGATCAATTTGTG------GCTAGAGCTACCATGTTTGTTGTAGCTCGGAATGCCCTGCTTTCTCTTCCTGTTCCAGTCCTGTCTTCTCGACTCAGATACTGTGCAGAGAACATCATCAAGAACTGCATC---------------TGCACTAACCTGTCTGTGTCCAGACTCTCCTGT---------GATGACATCACCTTCAACCGGCTCTACCAGTTTGTGACAGGCTGGACCCTGCTGGGCTCTGATCTCATCCTTATTGTTCTCTCCTACTCCTTCATCCTGAAAGCTGTGCTAAGG---------------------------------------ATCAAGGCTGAGGGT---------------------------------------------------------------------------------------------------------------------------------------------------------------------------------------------------------------------------------------------------------------------------------------------------------------------
LS070_Carollia_perspicillata_mybaits_NODE_91_length_1131_cov_40.333966|OR56 ---GCCTCACCCAGCAACTACTCCACTGCTCCAGTTTCTGATTTCCTCCTCATCTGCTTCCCTAACTACCAGAGTTGGCAGCACTGGCTGTCCCTGCCCCTCAGCCTCCTATTC---CTCCTGGCCATGGGGGCCAATGCCACCCTTCTGATCACCATCTGGCTGGAGGCATCTCTGCATGAGCCCATGTACTACCTGCTCAGCCTCCTCTCCCTGCTGGACATTGTGCTCTGCCTCACTGTCATCCCCAAGGTCCTGGCCATC---------TTCTGGTTTGACCTCAGGTCCATCAGCTTCTCTGCATGCTTCCTGCAGATGTTCATCATGAATTGCTTCCTTGCCATGGAGTCCTGCarollia_castaneaTTCATGGTCATGGCCTATGACCGCTATGTGGCCATCTGCCACCCACTAAGATACCCATCCATCATCACTGATCAATTTGTG------GCTAGAGCTACCATGTTTGTTGTAGCTCGGAATGCCCTGCTTTCTCTTCCTGTTCCAGTCCTGTCTTCTCGACTCAGATACTGTGCAGAGAACATCATCAAGAACTGCATC---------------TGCACTAACCTGTCTGTGTCCAGACTCTCCTGT---------GATGACATCACCTTCAACCGGCTCTACCAGTTTGTGACAGGCTGGACCCTGCTGGGCTCTGATCTCATCCTTATTGTTCTCTCCTACTCCTTCATCCTGAAAGCTGTGCTAAGG---------------------------------------ATCAAGGCTGAGGGTGCTGCAGCCAAGGCTCTG---------------------------------------------------------------------------------------------------------------------------------------------------------------------------------------------------------------------------------------------------------------------------------------------------
LS070_Carollia_perspicillata_mybaits_NODE_75_length_1323_cov_34.268860|OR56 ---GCCTCACCCAGCAACTACTCCACTGCTCCAGTTTCTGAATTCCTCCTCATCTGCTTCCCTAACTACCAGAGTTGGCAGCACTGGCTGTCCCTGCCCCTCAGCCTCCTATTC---CTCCTGGCCATGGGGGCCAATGCCACCCTTCTGATCACCATCTGGCTGGAGGCATCTCTGCATGAGCCCATGTACTACCTGCTCAGCCTCCTCTCCCTGCTGGACATTGTGCTCTGCCTCACTGTCATCCCCAAGGTCCTGGCCATC---------TTCTGGTTTGACCTCAGGTCCATCAGCTTCTCTGCATGCTTCCTGCAGATGTTCATCATGAATTGCTTCCTTGCCATGGAGTCCTGCarollia_castaneaTTCATGGTCATGGCCTATGACCGCTATGTGGCCATCTGCCACCCACTAAGATACCCATCCATCATCACTGATCAATTTGTG------GCTAGAGCTACCATGTTTGTTGTAGCCCGGAATGCCCTGTTTTTTCTTCCTGTTCCAGTCCTGTCTTCTCGACTCAGATACTGTGCAGAGAACATCATCAAGAACTGCATC---------------TGCTCTAACCTGTCTGTGTCCAGACTCTCCTGT---------GATGACATCACCTTCAACCGGCTCTACCAGTTTGTGACAGGCTGGACCCTGCTGGGCTCTGATCTCATCCTTATTGTTCTCTCCTACTCCTTCATCCTGAAAGCTGTGCTAAGG---------------------------------------ATCAAGGCTGAGGGTGCTGCAGCCAAGGCCCTGAGCACCTGTGGTTCTCACTTCATCCTCATCCTCTTCTTCAGCarollia_castaneaGTCCTGCTGGTTCTGGTCATCACCAACCTGGCC---------------------------------------------------------------------------------------------------------------------------------------------------------------------------------------------------------------------
LS073_Carollia_sowelli_mybaits_NODE_94_length_1215_cov_30.105448|OR56 ---ACTTCACCCAGCAACTACTCCACTGCTCCAGTCTCTGAATTCCTCCTCATCTGCTTCCCTAACTACCAGAGTTGGCAGCACTGGCTGTCCCTGCCCCTCAGCCTCCTATTC---CTCCTGGCCATGGGGGCCAATGCCACCCTTCTGATCACCATCTGGCTGGAGGCTTCTCTGCATGAGCCCATGTACTACCTGCTCAGCCTCCTCTCCCTGCTGGACATTGTGCTCTGCCTCACTGTCATCCCCAAGGTCCTGGCCATC---------TTCTGGTTTGACCTCAGGTCCATCAGCTTCTCTGCATGCTTCCTCCAAATGTTTATCATGAATTGCTTCCTTGCCATGGAGTCCTGCarollia_castaneaTTCATGGTCATGGCCTATGACCGCTATGTGGCCATCTGCCACCCACTAAGATACCCATCCATCATCACTGATCAATTTGTG------GCTAGAGCTACCATGTTTGTTGTAGCCCGGAATGCCCTACTTTTTCTTCCTGTTCCAGTCCTGTCTTCTCGACTCAGATACTGTGCAGAGAACATCATCAAGAACTGCATC---------------TGCTCTAACCTGTCTGTGTCCAGACTCTCCTGT---------GATGACATCACCTTCAACCGGCTCTACCAGTTTGTGACAGGCTGGACCCTGCTGGGCTCTGATCTCATCCTTATTGTTCTCTCCTACTCCTTCATCCTGAAAGCTGTGCTAAAG---------------------------------------ATCAAGGCTGAGGGTGCTGCAGCCAAGGCCCTGAGCACTTGTGGTTCTCACTTCATACTCATCCTCTTCTTCAGCarollia_castaneaGTCCTGCTGGTTCTGGTC------------------------------------------------------------------------------------------------------------------------------------------------------------------------------------------------------------------------------------
LS073_Carollia_sowelli_mybaits_NODE_95_length_1173_cov_35.803832|OR56 ---ACTTCACCCAGCAACTACTCCACTGCTCCAGTTTCTGAATTTCTACTCATCTGCTTCCCTAACTACCAGAGTTGGCAGCACTGGCTGTCCCTGCCCCTCAGCCTCCTATTC---CTCCTGGCCATGGGGGCCAATGCCACCCTTCTGATCACCATCTGGCTGGAGGCATCTCTGCATGAGCCCATGTACTACCTGCTCAGCCTCCTCTCCCTGCTGGACATTGTGCTCTGCCTCACTGTCATCCCCAAGGTCCTGGCCATC---------TTCTGGTTTGACCTCAGGTCCATCAGCTTCTCTGCATGCTTCCTCCAAATGTTTATCATGAATTGCTTCCTTGCCATGGAGTCCTGCarollia_castaneaTTCATGGTCATGGCCTATGACCGCTATGTGGCCATCTGCCACCCACTAAGATACCCATCCATCATCACTGATCAATTTGTG------GCTAGAGCTACCATGTTTGTTGTAGCCCGGAATGCCCTACTTTTTCTTCCTGTTCCAGTCCTGTCTTCTCGACTCAGATACTGTGCAGAGAACATCATCAAGAACTGCATC---------------TGCTCTAACCTGTCTGTGTCCAGACTCTCCTGT---------GATGACATCACCTTCAACCGGCTCTACCAGTTTGTGACAGGCTGGACCCTGCTGGGCTCTGATCTCATCCTTATTGTTCTCTCCTACTCCTTCATCCTGAAAGCTGTGCTAAAG---------------------------------------ATCAAGGCTGAGGGTGCTGCAGCCAAGGCCCTGAGCACTTGTGGTTCTCACTTCATACTCATCCTCTTCTTCAGCarollia_castaneaGTCCTGCTGGTTCTGGTCATCACCAACCTGGCC---------------------------------------------------------------------------------------------------------------------------------------------------------------------------------------------------------------------
LS073_Carollia_sowelli_mybaits_NODE_78_length_1350_cov_26.242734|OR56 ---GCCTCACCCAGCAACTACTCCACTGCTCCAGTCTCTGAATTCCTCCTCATCTGCTTCCCTAACTACCAGAGTTGGCAGCACTGGCTGTCCCTGCCCCTCAGCCTCCTATTC---CTCCTGGCCATGGGGGCCAATGCCACCCTTCTGATCACCATCTGGCTGGAGGCATCTCTGCATGAGCCCATGTACTACCTGCTCAGCCTCCTCTCCCTGCTGGACATTGTGCTCTGCCTCACTGTCATCCCCAAGGTCCTGGCCATC---------TTCTGGTTTGACCTCAGGTCCATCAGCTTCTCTGCATGCTTCCTCCAAATGTTTATCATGAATTGCTTCCTTGCCATGGAGTCCTGCarollia_castaneaTTCATGGTCATGGCCTATGACCGCTATGTGGCCATCTGCCACCCACTAAGATACCCATCCATCATCACTGATCAATTTGTG------GCTAGAGCTACCATGTTTGTTGTAGCCCGGAATGCCCTACTTTTTCTTCCTGTTCCAGTCCTGTCTTCTCGACTCAGATACTGTGCAGAGAACATCATCAAGAACTGCATC---------------TGCTCTAACCTGTCTGTGTCCAGACTCTCCTGT---------GATGACATCACCTTCAACCGGCTCTACCAGTTTGTGACAGGCTGGACCCTGCTGGGCTCTGATCTCATCCTTATTGTTCTCTCCTCCTCCTTCATCCTGAAAGCTGTGCTAAAG---------------------------------------ATCAAGGCTGAGGGTGCTGCAGCC------------------------------------------------------------------------------------------------------------------------------------------------------------------------------------------------------------------------------------------------------------------------------------------------------------
LS073_Carollia_sowelli_mybaits_NODE_33_length_1083_cov_4.929423|OR56 ---------------------------------------------------AATTGTTTTGTGAGGTCACCCAGGTTGCAGTTCTGGCTATCTATGCCCCTCAGCCTCCTTTTC---CTCCTGGCCATGGGGGCCAATAGTATTCTCCTGATCACCATCTGGCTGGAGGCTTCTCTGCACGAGCCCTTGTACTATCTGCTTGGCCTTCTTTCCTTGCTAGACATGGTGCTCTGCCTCACTGTCATCCCCAAGGTTCTGCTTATC---------TTCTGGTTTGATCTCAGGCCCATCAGCTTCTATGTCTGCTTCCTTCAGATGTACATCATGAATAGTTTTTTGGCCATGGAGTCTTGCarollia_castaneaTTCATGGTCATGGCCTATGACCGCTATATAGCCATCTGCCATCCACTGAGGTACCCATCCATTATTAATGATCAATTTGTA------GCTAAGGCTGCCATTTTTATTTTGGCCAGGAATGTCCTTTTCarollia_castaneaATACCCATCCCCATTCTCTCAGCACGACTCTATTATTGTGGGAAAAATGTCATCGAGAACTGTATC---------------TGTGCCAATATATCAGTCTCTGGGCTCTCCTGT---------GATGACATCACCATCAATCGTCTCTACCAATTGGCTGGAGGCTGGACTCTGCTAGGATCTGACCTCATCCTCATCTTCCTCTCCTACACCTTCATACTACGAGCAGTGCTGAGA---------------------------------------CTCAAGGCAGAGGGTGCTGTGGCCAAGGCCCTAAGCarollia_castaneaTGTAGCTCCCACTTCATCCTTATCCTCTTCTTCAAT---------------------------------------------------------------------------------------------------------------------------------------------------------------------------------------------------------------------------------------------------------
LS073_Carollia_sowelli_mybaits_NODE_36_length_1086_cov_7.988107|OR56 ---------------------------------------------------AATTGTTTTGTGAGGTCACCCAGGTTGCAGTTCTGGCTATCTATGCCCCTCAGCCTCCTTTTC---CTCCTGGCCATGGGGGCCAATAGTATTCTCCTGATCACCATCTGGCTGGAGGCTTCTCTGCACGAGCCCTTGTACTATCTGCTTGGCCTTCTTTCCTTGCTAGACATGGTGCTCTGCCTCACTGTCATCCCCAAGGTTCTGCTTATC---------TTCTGGTTTGATCTCAGGCCCATCAGCTTCTATGTCTGCTTCCTTCAGATGTACATCATGAATAGTTTTTTGGCCATGGAGTCTTGCarollia_castaneaTTCATGGTCATGGCCTATGACCGCTATATAGCCATCTGCCATCCACTGAGGTACCCATCCATTATTAATGATCAATTTGTA------GCTAAGGCTGCCATTTTTATTTTGGCCAGGAATGTCCTTTTCarollia_castaneaATACCCATCCCCATTCTCTCAGCACGACTCTATTATTGTGGGAAAAATGTCATCGAGAACTGTATC---------------TGTGCCAATATATCAGTCTCTGGGCTCTCCTGT---------GATGACATCACCATCAATCGTCTCTACCAATTTGCTGGAGGCTGGACTCTGCTAGGATCTGACCTCATCCTCATCTTCCTCTCCTACACCTTCATACTACGAGCAGTGCTGAGC---------------------------------------CTGAAGGCAGAG------------------------------------------------------------------------------------------------------------------------------------------------------------------------------------------------------------------------------------------------------------------------------------------------------------------------
LS073_Carollia_sowelli_mybaits_NODE_38_length_824_cov_6.627845|OR56 ---------------------------------------------------AATTGTTTTGTGAGGTCACCCAGGTTGCAGTTCTGGCTATCTATGCCCCTCAGCCTCCTTTTC---CTCCTGGCCATGGGGGCCAATAGTATTCTCCTGATCACCATCTGGCTGGAGGCTTCTCTGCACGAGCCCTTGTACTATCTGCTTGGCCTTCTTTCCTTGCTAGACATGGTGCTCTGCCTCACTGTCATCCCCAAGGTTCTGCTTATC---------TTCTGGTTTGATCTCAGGCCCATCAGCTTCTATGTCTGCTTCCTTCAGATGTACATCATGAATAGTTTTTTGGCCATGGAGTCTTGCarollia_castaneaTTCATGGTCATGGCCTATGACCGCTATATAGCCATCTGCCATCCACTGAGGTACCCATCCATTATTAATGATCAATTTGTA------GCTAAGGCTGCCATTTTTATTTTGGCCAGGAATGTCCTTTTCarollia_castaneaATACCCATCCCCATTCTCTCAGCACGACTCTATTATTGTGGGAAAAATGTCATCGAGAACTGTATC---------------TGTGCCAATATATCAGTCTCTGGGCTCTCCTGT---------GATGACATCACCATCAATCGTCTCTACCAATTTGCTGGAGGCTGGACTCTGCTAGGATCTGACCTCATCCTCATCTTCCTCTCCTACACCTTCATACTACGAGCAGTGCTGAGA---------------------------------------CTCAAGGCAGAG------------------------------------------------------------------------------------------------------------------------------------------------------------------------------------------------------------------------------------------------------------------------------------------------------------------------
LS073_Carollia_sowelli_mybaits_NODE_145_length_752_cov_8.146667|OR56 ---------------------------------------------------AATTGTTTTGTGAGGTCACCCAGGTTGCAGTTCTGGCTATCTATGCCCCTCAGCCTCCTTTTC---CTCCTGGCCATGGGGGCCAATAGTATTCTCCTGATCACCATCTGGCTGGAGGCTTCTCTGCACGAGCCCTTGTACTATCTGCTTGGCCTTCTTTCCTTGCTAGACATGGTGCTCTGCCTCACTGTCATCCCCAAGGTTCTGCTTATC---------TTCTGGTTTGATCTCAGGCCCATCAGCTTCTATGTCTGCTTCCTTCAGATGTACATCATGAATAGTTTTTTGGCCATGGAGTCTTGCarollia_castaneaTTCATGGTCATGGCCTATGACCGCTATATAGCCATCTGCCATCCACTGAGGTACCCATCCATTATTAATGATCAATTTGTA------GCTAAGGCTGCCATTTTTATTTTGGCCAGGAATGTCCTTTTCarollia_castaneaATACCCATCCCCATTCTCTCAGCACGACTCTATTATTGTGGGAAAAATGTCATCGAGAACTGTATC---------------TGTGCCAATATATCAGTCTCTGGGCTCTCCTGT---------GATGACATCACCATCAATCGTCTCTACCAATTTGCTGGAGGCTGGACTCTGCTAGGATCTGACCTCATCCTCATC------------------------------------------------------------------------------------------------------------------------------------------------------------------------------------------------------------------------------------------------------------------------------------------------------------------------------------------------------------------------------------------------------------------
LS070_Carollia_perspicillata_mybaits_NODE_7_length_1456_cov_37.812908|OR56 ---------------------------------------------------ATGGGATTCCCAGGCATCCarollia_castaneaGCTGGCAGCACTGGCTCTCCTTGCCCTTGGCTTTGCTTTTC---CTCTTAGCTCTCAGTGCCAACATTCTTATCCTGAGTGTCATCAGTCAAGAGCCAGCATTGCACCAGCCTATGTACTATCTCCTGGGCATCCTGGCTGTGGTAGACCTGGGCCTGGCTTCCACTGTCATGCCCAGGATATTGGCCATC---------TTATGGTTCAATGCTAAAGCCATCAGTCTTCCTGAGTGCTTTCTGCAGATGTATATTATACATTGTTTTATGGCCATGGAGTCAGGTGTCTTAGCCTGCATGGCAATAGATAGATATGTAGCTATTTGTCAACCACTACACTATCTGTCATTAATTAGTGAATCTTTTGTG------GTCAAGGCAACTGTGTTCATGGCACTCAGAGGCACTCTTACTGCATTCCCAGTGCCTGTATTGGCTGCTCAAAGACATTACTGCTCCCAAAACCAAATAGAACATTGTTTG---------------TGCTCTAATTTTGCCGTCACGAATCTATCCTGT---------GATGACAGGACAATCAACAGAATCTACCAGCTATTTCTGGCCTGGACAATCTTGGTTTGTGATCTGGGTTTGACTATTGTTTCATATGCTTTGATATTTTACTCTGTATTGAAG---------------------------------------TTGAACTCAGCAGAAGCTACATCCAAAGCCATAACTACCTGCarollia_castaneaTCCCACCTAATTCTTATTCTATTCTACTATACATCTGTCATTATTCTTCCCATCAGTAACTATGCAGCAGTGACAGTTCCTGCC---ATTCCAGTGCTGCTCACTGTCCTAGAA---ATTGTCGTTCCTCCTGCCCTTAACCCCATGGTGTATGCACTCAAAAACAAAGAGCTCCAGCAGGCTCTATATAAGCTTCTTAAACTA---------------------------Carollia_castaneaTCAACAGGAAC---------------------------------
LS070_Carollia_perspicillata_mybaits_NODE_8_length_1316_cov_33.111380|OR56 ---------------------------------------------------ATGGGATTCCCAGGCATCCarollia_castaneaGCTGGCAGCACTGGCTCTCCTTGCCCTTGGCTTTGCTTTTC---CTCTTAGCTCTCAGTGCCAACATTCTTATCCTGAGTGTCATCAGTCAAGAGCCAGCATTGCACCAGCCTATGTACTATCTCCTGGGCATCCTGGCTGTGGTAGACCTGGGCCTGGCTTCCACTGTCATGCCCAGGATATTGGCCATC---------TTATGGTTCAATGCTAAAGCCATCAGTCTTCCTGAGTGCTTTCTGCAGATGTATATTATACATTGTTTTATGGCCATGGAGTCAGGTGTCTTAGCCTGCATGGCAATAGATAGATATGTAGCTATTTGTCAACCACTACACTATCTGTCATTAATTAGTGAATCTTTTGTG------GTCAAGGCAACTGTGTTCATGGCACTCAGAGGCACTCTTACTGCATTCCCAGTGCCTGTATTGGCTGCTCAAAGACATTACTGCTCCCAAAACCAAATAGAACATTGTTTG---------------TGCTCTAATTTTGCCGTCACGAATCTATCCTGT---------GATGACAGGACAATCAACAGAATCTACCAGCTATTTCTGGCCTGGACAATCTTGGTTTGTGATCTGGGTTTGACTATTGTTTCATATGCTTTGATATTTTACTCTGTATTGAAG---------------------------------------TTGAACTCAGCAGAAGCTACATCCAAAGCCATAACTACCTGCarollia_castaneaTCCCACCTAATTCTTATTCTATTCTACTATGCATCTGTCATTATTCTTCCCATCAGTAACTATGCAGCAGTGACAGTTCCTGCC---ATTCCAGTGCTGCTCACTGTCCTAGAA---ATTGTCGTTCCTCCTGCCCTTAACCCCATGGTGTATGCACTCAAAAACAAAGAGCTCCAGCAGGCTCTATATAAGCTTCTTAAACTA---------------------------Carollia_castaneaTCAACAGGAAC---------------------------------
LS073_Carollia_sowelli_mybaits_NODE_8_length_1161_cov_45.851476|OR56 ---------------------------------------------------ATGGGATTCCCAGGCATCCarollia_castaneaGCTGGCAGCACTGGCTCTCCTTGCCCTTGGCTTTGCTTTTC---CTCTTAGCTCTCAGTGCCAACATTCTTATCCTGAGTGTCATCAGTCAAGAGCCAGCATTGCACCAGCCTATGTACTATCTCCTGGGCATCCTGGCTGTGGTAGACCTGGGCCTGGCTTCCACTGTCATGCCCAGGATATTGGCCATC---------TTATGGTTCAATGCTAAAGCCATCAGTCTTCCTGAGTGCTTTCTGCAGATGTATATTATACATTGTTTTATGGCCATGGAGTCAGGTGTCTTAGCCTGCATGGCAATAGATAGATATGTAGCTATTTGTCGACCACTACACTATCTGTCATTAATTAGTGAATCTTTTGTG------GTCAAGGCAACTGTGTTCATGGCACTCAGAGGCACTCTTACTGCATTCCCAGTGCCTGTATTGGCTGCTCAAAGACATTACTGCTCCCAAAACCAAATAGAACATTGTTTG---------------TGCTCTAATTTTGCCGTCACGAATCTATCCTGT---------GATGACAGGACAATCAACAGAATCTACCAGCTATTTCTGGCCTGGACAATCTTGGTTTGTGATCTGGGTTTGACTATTGTTTCATATGCTTTGATATTTTACTCTGTATTGAAG---------------------------------------TTGAACTCAGCAGAAGCTACATCCAAAGCCATAACTACCTGCarollia_castaneaTCCCACCTAATTCTTATTCTATTCTACTATACATCTGTCATTATTCTTCCCATCAGTAACTATGCAGCAGTGACAGTTCCTGCC---ATTCCAGTGCTGCTCACTGTCCTAGAA---ATTGTCGTTCCTCCTGCCCTTAACCCCATGGTGTATGCACTCAAAAACAAAGAGCTCCAGCAGGCTCTATATAAGCTTCTTAAACTA---------------------------Carollia_castaneaTCAACAGGAAC---------------------------------
LS073_Carollia_sowelli_mybaits_NODE_9_length_1148_cov_54.657330|OR56 ---------------------------------------------------ATGGGATTCCCAGGCATCCarollia_castaneaGCTGGCAGCACTGGCTCTCCTTGCCCTTGGCTTTGCTTTTC---CTCTTAGCTCTCAGTGCCAACATTCTTATCCTGAGTGTCATCAGTCAAGAGCCAGCATTGCACCAGCCTATGTACTATCTCCTGGGCATCCTGGCTGTGGTAGACCTGGGCCTGGCTTCCACTGTCATGCCCAGGATATTGGCCATC---------TTATGGTTCAATGCTAAAGCCATCAGTCTTCCTGAGTGCTTTCTGCAGATGTATATTATACATTGTTTTATGGCCATGGAGTCAGGTGTCTTAGCCTGCATGGCAATAGATAGATATGTAGCTATTTGTCGACCACTACACTATCTGTCATTAATTAGTGAATCTTTTGTG------GCCAAGGCAACTGTGTTCATGGCACTCAGAGGCACTCTTACTGCATTCCCAGTGCCTGTATTGGCTGCTCAAAGACATTACTGCTCCCAAAACCAAATAGAACATTGTTTG---------------TGCTCTAATTTTGCCGTCACGAATCTATCCTGT---------GATGACAGGACAATCAACAGAATCTACCAGCTATTTCTGGCCTGGACAATCTTGGTTTGTGATCTGGGTTTGACTATTGTTTCATATGCTTTGATATTTTACTCTGTATTGAAG---------------------------------------TTGAACTCAGCAGAAGCTACATCCAAAGCCATAACTACCTGCarollia_castaneaTCCCACCTAATTCTTATTCTATTCTACTATACATCTGTCATTATTCTTCCCATCAGTAACTATGCAGCAGTGACAGTTCCTGCC---ATTCCAGTGCTGCTCACTGTCCTAGAA---ATTGTCGTTCCTCCTGCCCTTAACCCCATGGTGTATGCACTCAAAAACAAAGAGCTCCAGCAGGCTCTATATAAGCTTCTTAAACTA---------------------------Carollia_castaneaTCAACAGGAAC---------------------------------
LS084_Carollia_castanea_mybaits_NODE_6_length_1687_cov_17.737267|OR56 ---------------------------------------------------ATGGGATTCCCAGGCATCCarollia_castaneaGCTGGCAGCACTGGCTCTCCTTGCCCTTGGCTTTGCTTTTC---CTCTTAGCTCTCAGTGCCAACATTCTTATCCTGAGTGTCATCAGTCAAGAGCCAGCATTGCACCAGCCTATGTACTATCTCCTGAGCATCCTGGCTGTGGTAAACCTGGGCCTGGCTTCCACTGTCATGCarollia_castaneaGGATATTGGCCATT---------TTATGGTTCAATGCTAAAGCCATCAGTCTTCCTGAGTGCTTTCTGCAGATGTATATTATACATTGTTTTATGGCCATGGAGTCAGGTGTCTTAGCCTGCATGACAATAGATAGATATGTAGCTATTTGTCCACCACTACACTATCTGTCATTAATTAGTGAATCTTTTGTG------GTCAAGGCAACTGTGTTCATGGCACTCAGAGGCACTCTTACTGCATTCCCAGTGCCTGTATTGGCTGCTCAAAGACATTACTGCTCCCAAAACCAAATAGAACATTGTCTG---------------TGCTCTAATTTTGCTGTCACGAATCTATCCTGT---------GATGACAGGACAATCAACAGAATCTACCAGCTATTTCTGGCCTGGACAATCTTGATTTGTGATCTGGGTTTGACTATTGTTTCATATGCTTTGATATTTTACTCTGTATTGAAG---------------------------------------TTGAACTCAGCAGAAGCTACATCCAAGGCCATAACTACCTGCarollia_castaneaTCCCACCTAATTCTTATTCTATTCTACTATACATCTGTCATTATTCTTCCCATCAGTAACTATGCAGCAGTGACAGTTCCTGCC---ATTCCAGTGCTGCTCACTATACTAGAG---ATTGTCGTTCCTCCTGCCCTTAACCCCATGGTGTATGCACTCAAAAACAAAGAGCTCCAGCAGGCTCTATATAAGCTTCTTAAACTA---------------------------Carollia_castaneaTCAACAGGAAC---------------------------------
LS084_Carollia_castanea_mybaits_NODE_8_length_1229_cov_21.338542|OR56 ---------------------------------------------------ATGGGATTCCCAGGCATCCarollia_castaneaGCTGGCAGCACTGGCTCTCCTTGCCCTTGGCTTTGCTTTTC---CTCTTAGCTCTCAGTGCCAACATTCTTATCCTGAGTGTCATCAGTCAAGAGCCAGCATTGCACCAGCCTATGTACTATCTCCTGAGCATCCTGGCTGTGGTAAACCTGGGCCTGGCTTCCACTGTCATGCarollia_castaneaGGATATTGGCCATT---------TTATGGTTCAATGCTAAAGCCATCAGTCTTCCTGAGTGCTTTCTGCAGATGTATATTATACATTGTTTTATGGCCATGGAGTCAGGTGTCTTAGCCTGCATGGCAATAGATAGATATGTAGCTATTTGTCCACCACTACACTATCTGTCATTAATTAGTGAATCTTTTGTG------GTCAAGGCAACTGTGTTCATGGCACTCAGAGGCACTCTTACTGCATTCCCAGTGCCTGTATTGGCTGCTCAAAGACATTACTGCTCCCAAAACCAAATAGAACATTGTCTG---------------TGCTCTAATTTTGCTGTCACGAATCTATCCTGT---------GATGACAGGACAATCAACAGAATCTACCAGCTATTTCTGGCCTGGACAATCTTGATTTGTGATCTGGGTTTGACTATTGTTTCATATGCTTTGATATTTTACTCTGTATTGAAG---------------------------------------TTGAACTCAGCAGAAGCTACATCCAAGGCCATAACTACCTGCarollia_castaneaTCCCACCTAATTCTTATTCTATTCTACTATACATCTGTCATTATTCTTCCCATCAGTAACTATGCAGCAGTGACAGTTCCTGCC---ATTCCAGTGCTGCTCACTATACTAGAG---ATTGTCGTTCCTCCTGCCCTTAACCCCATGGTGTATGCACTCAAAAACAAAGAGCTCCAGCAGGCTCTATATAAGCTTCTTAAACTA---------------------------Carollia_castaneaTCAACAGGAAC---------------------------------
LS084_Carollia_castanea_mybaits_NODE_9_length_1156_cov_24.423540|OR56 ---------------------------------------------------ATGGGATTCCCAGGCATCCarollia_castaneaGCTGGCAGCACTGGCTCTCCTTGCCCTTGGCTTTGCTTTTC---CTCTTAGCTCTCAGTGCCAACATTCTTATCCTGAGTGTCATCAGTCAAGAGCCAGCATTGCACCAGCCTATGTACTATCTCCTGAGCATCCTGGCTGTGGTAGACCTGGGCCTGGCTTCCACTGTCATGCarollia_castaneaGGATATTGACCATT---------TTATGGTTCAATGCTAAAGCCATCAGTCTTCCTGAGTGCTTTCTGCAGATGTATATTATACATTGTTTTATGGCCATGGAGTCAGGTGTCTTAGCCTGCATGGCAATAGATAGATATGTAGCTATTTGTCCACCACTACACTATCTGTCATTAATTAGTGAATCTTTTGTG------GTCAAGGCAACTGTGTTCATGGCACTCAGAGGCACTCTTACTGCATTCCCAGTGCCTGTATTGGCTGCTCAAAGACATTACTGCTCCCAAAACCAAATAGAACATTGTCTG---------------TGCTCTAATTTTGCTGTCACGAATCTATCCTGT---------GATGACAGGACAATCAACAGAATCTACCAGCTATTTCTGGCCTGGACAATCTTGATTTGTGATCTGGGTTTGACTATTGTTTCATATGCTTTGATATTTTACTCTGTATTGAAG---------------------------------------TTGAACTCAGCAGAAGCTACATCCAAGGCCATAACTACCTGCarollia_castaneaTCCCACCTAATTCTTATTCTATTCTACTATACATCTGTCATTATTCTTCCCATCAGTAACTATGCAGCAGTGACAGTTCCTGCC---ATTCCAGTGCTGCTCACTATACTAGAG---ATTGTCGTTCCTCCTGCCCTTAACCCCATGGTGTATGCACTCAAAAACAAAGAGCTCCAGCAGGCTCTATATAAGCTTCTTAAACTA---------------------------Carollia_castaneaTCAACAGGAAC---------------------------------
ROOT_NM_000676.2_root_extraction ------------------------------------------ATGCTGCTG---------------------GAGACarollia_castaneaGGACGCGCTGTACGTGGCGCTGGAGCTGGTCATCGCCGCGCTTTCGGTGGCGGGCAACGTGCTGGTGTGCGCCGCGGTGGGCACGGCGAACACTCTGCAGACGCCCACCAACTACTTCCTGGTGTCCCTGGCTGCGGCCGACGTGGCCGTGGGGCTCTTCGCCATCCCCTTTGCCATCACCATCAGCCTGGGCTTCTGCACTGACTTCTACGGCTGCCTCTTCCTCGCCTGCTTCGTGCTGGTGCTCACGCAGAGCTCCATCTTCAGCCTT---------------CTGGCCGTGGCAGTCGACAGATACCTGGCCATCTGTGTCCCGCTCAGGTATAAAAGTTTGGTCACGGGGACCCGAGCAAGAGGGGTCATTGCTGTCCTCTGGGTCCTTGCCTTTGGCATCGGATTGACT---------CCATTCCTGGGGTGGAACAGTAAAGACAGTGCCACCAAC---------AACTGCarollia_castaneaGAACCCTGGGATGGAACCACGAATGAAAGCTGCTGCCTTGTGAAGTGTCTCTTTGAGAATGTGGTCCCCATGAGCTACATGGTATATTTCAATTTCTTTGGGTGTGTTCTGCCCCCACTGCTTATAATGCTGGTGATCTACATTAAGATCTTCCTGGTGGCCTGCAGGCAGCTTCAGCGCACTGAGCTGATGGACCACTCGAGGACCACCCTCCAGCGGGAGATCCATGCAGCCAAGTCACTGGCCATGATTGTGGGGATTTTTGCCCTGTGCTGGTTACCTGTGCATGCTGTTAACTGTGTCACTCTTTTCCAGCCAGCTCAGGGTAAAAATAAGCCCAAGTGGGCAATGAATATGGCCATTCTTCTGTCarollia_castaneaT---GCCAATTCAGTTGTCAATCCCATTGTCTATGCTTACCGGAACCGAGACTTCCGCTACACTTTTCarollia_castaneaAAATTATCTCCAGGTATCTTCTCTGCCAAGCAGATGTCAAGAGTGGGAATGGTCAGGCTGGGGTACAGCCTGCTCTCGGTGTGGGCCTA
